# Supplementary material for: Context-Dependent Requirement of Euchromatic Histone Methyltransferase Activity during Reprogramming to Pluripotency
Source: PubMed Central journal article supplement — Stem Cell Reports. 2020 Sep 24;15(6):1233–45. doi: 10.1016/j.stemcr.2020.08.011 (PMC7724475; doi:10.1016/j.stemcr.2020.08.011), 2020-09-24
Supplement: mmc6.pdf [file mmc6.pdf]

## Context-Dependent Requirement of Euchromatic Histone Methyltransferase Activity during Reprogramming to Pluripotency

Simon E. Vidal,<sup>1,2,5,10</sup> Alexander Polyzos,<sup>9,12</sup> Kaushiki Chatterjee,<sup>9,12</sup> Ly-sha Ee,<sup>1,2,5,9</sup> Emily Swanzey,<sup>1,2,5,11</sup> Jorge Morales-Valencia,<sup>3</sup> Hongsu Wang,<sup>1,2</sup> Chaitanya N. Parikh,<sup>9</sup> Bhishma Amlani,<sup>1,2,5</sup> Shengjiang Tu,<sup>3,6</sup> Yixiao Gong,<sup>4,5</sup> Valentina Snetkova,<sup>4</sup> Jane A. Skok,<sup>4</sup> Aristotelis Tsirigos,<sup>4,5,8</sup> Sangyong Kim,<sup>4,7</sup> Effie Apostolou,<sup>9</sup> and Matthias Stadtfeld<sup>1,2,5,9,\*</sup>

<sup>1</sup>Skirball Institute of Biomolecular Medicine, Department of Cell Biology, NYU Langone Medical Center, New York, NY 10016, USA

<sup>2</sup>Helen L. and Martin S. Kimmel Center for Biology and Medicine, NYU Langone Medical Center, New York, NY 10016, USA

<sup>3</sup>Department of Biochemistry and Molecular Pharmacology, NYU Langone Medical Center, New York, NY 10016, USA

<sup>4</sup>Department of Pathology, NYU Langone Medical Center, New York, NY 10016, USA

<sup>5</sup>Laura and Isaac Perlmutter Cancer Center, NYU Langone Medical Center, New York, NY 10016, USA

<sup>6</sup>Howard Hughes Medical Institute, NYU Langone Medical Center, New York, NY 10016, USA

<sup>7</sup>Office for Collaborative Science, NYU Langone Medical Center, New York, NY 10016, USA

<sup>8</sup>Applied Bioinformatics Laboratories, NYU Langone Medical Center, New York, NY 10016, USA

<sup>9</sup>Sanford I. Weill Department of Medicine, Sandra and Edward Meyer Cancer Center, Weill Cornell Medicine, New York, NY 10021, USA

<sup>10</sup>Pharma Technical Development, Genentech, South San Francisco, CA 94080, USA

<sup>11</sup>The Jackson Laboratory, Bar Harbor, ME 04609, USA

<sup>12</sup>These authors contributed equally

\*Correspondence: [mas4011@med.cornell.edu](mailto:mas4011@med.cornell.edu)

<https://doi.org/10.1016/j.stemcr.2020.08.011>

### SUMMARY

Methylation of histone 3 at lysine 9 (H3K9) constitutes a roadblock for cellular reprogramming. Interference with methyltransferases or activation of demethylases by the cofactor ascorbic acid (AA) facilitates the derivation of induced pluripotent stem cells (iPSCs), but possible interactions between specific methyltransferases and AA treatment remain insufficiently explored. We show that chemical inhibition of the methyltransferases EHMT1 and EHMT2 counteracts iPSC formation in an enhanced reprogramming system in the presence of AA, an effect that is dependent on EHMT1. EHMT inhibition during enhanced reprogramming is associated with rapid loss of H3K9 dimethylation, inefficient downregulation of somatic genes, and failed mesenchymal-to-epithelial transition. Furthermore, transient EHMT inhibition during reprogramming yields iPSCs that fail to efficiently give rise to viable mice upon blastocyst injection. Our observations establish novel functions of H3K9 methyltransferases and suggest that a functional balance between AA-stimulated enzymes and EHMTs supports efficient and less error-prone iPSC reprogramming to pluripotency.

### INTRODUCTION

Covalent chromatin modifications such as DNA and histone methylation modulate gene expression and stabilize epigenetic states in a wide variety of biological processes. The genome-wide and locus-specific abundance of chromatin marks is determined by counteracting enzymatic activities, such as histone methyltransferases and demethylases (Black et al., 2012). Histone 3 at lysine 9 (H3K9) methylation is an epigenetic mark predominantly associated with gene repression that is conserved during evolution and plays important regulatory functions during embryonic development, sex determination, neuronal plasticity, immune cell function, and tumorigenesis (Benevento et al., 2015; Casciello et al., 2015; Kuroki and Tachibana, 2018; Scheer and Zaph, 2017). H3K9 trimethylation in heterochromatic regions is established by SETDB1 and SUV39H1/2 (Kang, 2015; Peters et al., 2001; Rice et al., 2003), while the H3K9 mono- and dimethyltransferases EHMT1 and EHMT2 (also known as GLP and G9A, respectively) mediate gene silencing at euchromatic loci (Shinkai and Tachibana, 2011). Enzymes involved in the establish-

ment of H3K9 methylation are repressors of core pluripotency-associated gene loci (Epsztejn-Litman et al., 2008) and, thus, have particular relevance for physiological and experimentally induced changes in cell identity (Becker et al., 2016; Feldman et al., 2006). Inefficient removal of H3K9 methylation is a frequent cause of incomplete transcriptional reprogramming after somatic cell nuclear transfer (Matoba et al., 2014) and has been reported to impede the binding of reprogramming factors to the genome during the derivation of induced pluripotent stem cells (iPSCs) (Soufi et al., 2012). Consequently, the formation of mouse (Chen et al., 2013b; Liang et al., 2012; Sridharan et al., 2013; Tran et al., 2015; Wang et al., 2011; Wei et al., 2017) and human (Onder et al., 2012; Soufi et al., 2012) iPSCs can be substantially facilitated by interference with H3K9 methyltransferases or by activation of the respective demethylases. Despite the importance of H3K9 methyltransferases for cellular reprogramming and different physiological and pathological processes (Shankar et al., 2013), our understanding of the regulatory interactions controlling the function of these enzymes in different cellular contexts remains incomplete. We reasoned that the systematic

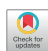

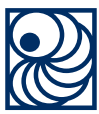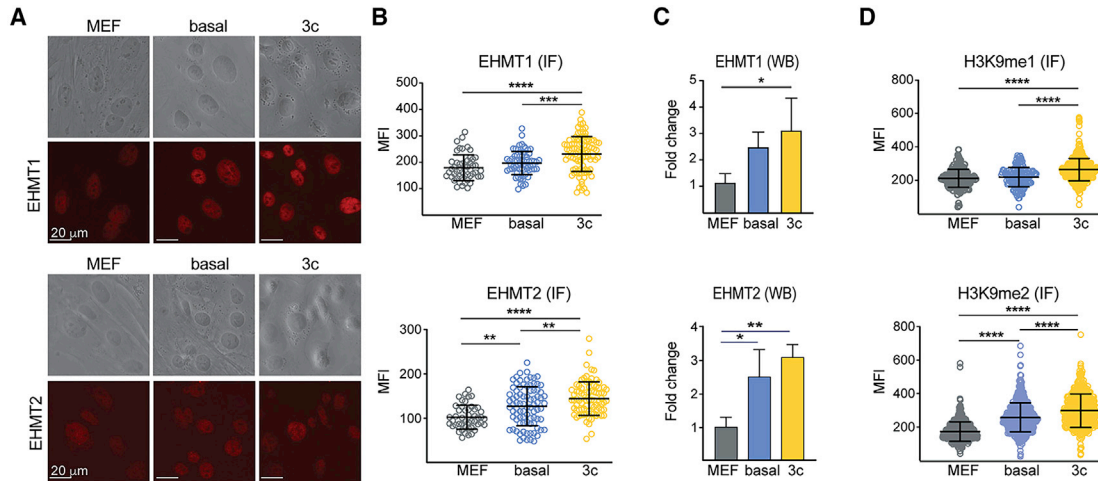

**Figure 1. Increased EHMT Activity during Early Stages of OKSM-Driven Reprogramming**

(A) Representative bright-field and fluorescence images of MEFs and cells under the indicated reprogramming conditions 24 h after induction of OKSM and staining with antibodies against EHMT1 (top) or EHMT2 (bottom).

(B) Mean fluorescence intensities after IF with antibodies against EHMT1 and EHMT2 under the indicated conditions. At least 100 size-matched nuclei were analyzed. Similar results were obtained in three independent experiments.

(C) Representative mean fold change in EHMT1 and EHMT2 protein levels analyzed by WB during basal and enhanced reprogramming.  $n = 3$  independent experiments.

(D) Same as (B) but after IF against indicated histone marks.

Significance in (B–D) with one-way ANOVA with Tukey post test: \* $p < 0.05$ , \*\* $p < 0.01$ , \*\*\* $p < 0.001$ , and \*\*\*\* $p < 0.0001$ .

comparison of cells that reprogram at markedly different efficiencies could be utilized to discover unexplored aspects of the H3K9 methylation machinery. By taking this approach, we were able to assign specific and context-dependent functions to the EHMTs during the reprogramming of fibroblasts into iPSCs by the “Yamanaka transcription factors” OCT4, KLF4, SOX2, and MYC (OKSM). In particular, we report the unexpected finding that EHMT activity supports efficient and faithful establishment of pluripotency under conditions that favor histone demethylation.

## RESULTS

### Context-Dependent Roles of EHMT Activity during Mouse Fibroblast Reprogramming

We used a well-established doxycycline (dox)-controllable transgenic system (Stadtfield et al., 2010b) to compare the roles of H3K9 methylation during iPSC formation either driven solely by the OKSM factors (“basal reprogramming”) or further supported by chemical modulation of the transforming growth factor  $\beta$  and WNT signaling pathways (via iALK5 and CHIR99021, respectively) and of chromatin state (via ascorbic acid, AA) (“3c enhanced reprogramming”) (Vidal et al., 2014). These compounds are commonly used to facilitate reprogramming and pluripo-

tent cell culture (Dakhore et al., 2018), and iPSCs generated via 3c enhanced reprogramming are developmentally highly competent (Amlani et al., 2018). 3c enhanced reprogramming yields approximately 50 times more stable iPSC colonies than basal reprogramming and does so in a shorter period of time (6 rather than 12 days of OKSM expression) (Penalosa-Ruiz et al., 2019; Saunders et al., 2017; Schwarz et al., 2018; Stelzer et al., 2015; Vidal et al., 2014). Since H3K9 methylation is a well-known roadblock for cellular reprogramming, we speculated that 3c might enhance iPSC formation by counteracting H3K9 methylation more efficiently than the OKSM factors alone. We focused our studies on EHMT1 and EHMT2, the major methyltransferases that catalyze the repressive H3K9me2 mark in mammalian cells.

Analyses by quantitative PCR (Figure S1A) and immunofluorescence (IF) (Figures 1A and 1B) showed a surprising upregulation of EHMT1 and EHMT2 at both the mRNA and the protein level 24 h after initiation of OKSM expression in basal and 3c enhanced conditions compared with uninduced mouse embryonic fibroblasts (MEFs). The observed increase in EHMT1 and EHMT2 was further supported by western blot (WB) analysis (Figures 1C and S1B). Since we observed significant differences in the abundance of housekeeper proteins frequently used to normalize WB signals between fibroblasts and reprogramming intermediates (including increased levels of histone

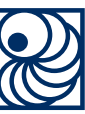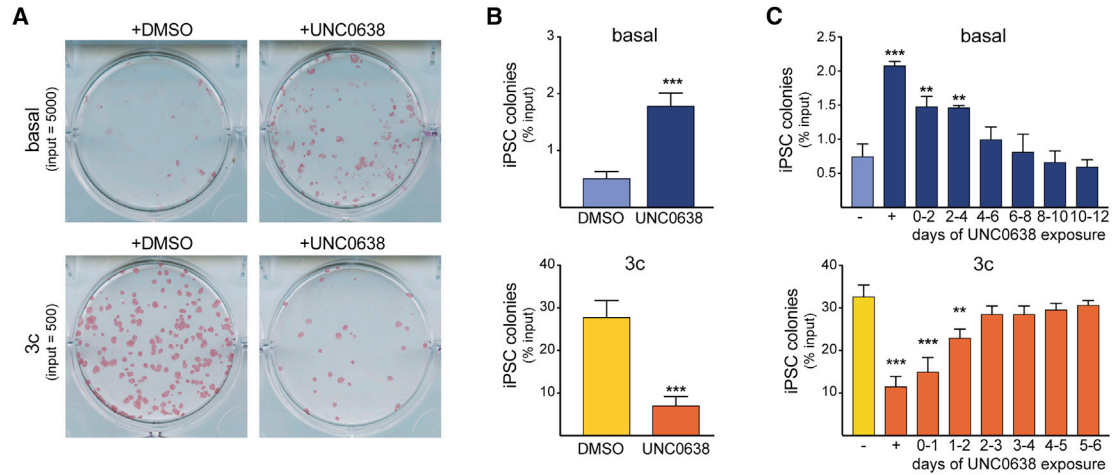

### Figure 2. EHMT Activity Supports 3c Enhanced Reprogramming

(A) Alkaline phosphatase staining of iPSCs formed from the indicated input MEFs via basal and 3c enhanced reprogramming in the absence and presence of UNC0638, respectively. Images were taken 4 days after dox was removed to select for stably reprogrammed cells. (B) Quantification of iPSC colony formation under the indicated conditions as percentage input MEFs.  $n = 3$  independent experiments. Significance with unpaired t test: \*\*\* $p < 0.001$ . (C) Percentage iPSC colonies formed from reprogrammable MEFs under basal or 3c enhanced conditions that were exposed to EHMT inhibitor during the indicated time windows (“+” indicates chronic exposure and “-” addition of DMSO instead of UNC0638). Input cells were 2,500 (basal) and 300 (3c enhanced) MEFs, respectively.  $n = 3$  independent experiments. Significance with one-way ANOVA with Dunnett post test: \*\* $p < 0.01$  and \*\*\* $p < 0.001$ .

H3), we normalized signals based on total protein levels determined by sensitive fluorescence assessment (Kirshner and Gibbs, 2018) (Figure S1C). Total H3K9 mono- and dimethylation (H3K9me1/2) levels also increased early during reprogramming (Figures 1D and S1D). IF suggested opposite trends for H3K9me3 (Figures S1D and S1E) and the activating marks H3K4me2 and H3K4me3 (Figure S1E), supporting the notion that dynamic chromatin remodeling commences early during iPSC formation (Koche et al., 2011).

We next evaluated the effect of treatment of MEFs undergoing reprogramming with UNC0638, an efficient and specific substrate inhibitor of EHMT activity (Vedadi et al., 2011). Standard doses (1  $\mu$ M) of UNC0638 reduced levels of H3K9me2, particularly under 3c enhanced conditions, as detected by both IF and WB (Figures S2A–S2C). This suggests that EHMT-mediated accumulation of H3K9me2 is an early and previously unappreciated event during cellular reprogramming, which appears more pronounced during 3c enhanced than during basal iPSC reprogramming.

Chemical and genetic interference with EHMTs during OKSM-driven reprogramming of mouse neural progenitor cells (Shi et al., 2008) and fibroblasts (Sridharan et al., 2013) has been reported to facilitate iPSC formation, supporting the prevalent notion that H3K9 methyltransferase activity counteracts the induction of pluripotency. Accordingly, EHMT inhibition via UNC0638 in our system

increased reprogramming efficiency under basal conditions (Figures 2A and 2B, top), generating significantly higher numbers of transgene-independent iPSC colonies—defined by their epithelial morphology and expression of an EGFP cassette inserted into the endogenous *Pou5f1* locus, also known as *Oct4* (Lengner et al., 2007)—after washout of dox (Figure S2D). To our surprise, iPSC formation was strongly impaired (3- to 5-fold) when UNC0638 was administered during 3c enhanced reprogramming (Figures 2A and 2B, bottom). We also obtained reduced numbers of iPSC colonies in the presence of UNC0638 during 3c enhanced reprogramming driven by OKS factors (no ectopic MYC) (Figures S2E and S2F) or when using lentiviral vectors expressing OKSM (Sommer et al., 2009) (Figure S2G), suggesting that our observations are not restricted to a single reprogramming approach. Together, these findings demonstrate that 3c enhanced reprogramming, in contrast to basal reprogramming, partially becomes dependent on EHMT activity.

### EHMT Inhibition Counteracts Downregulation of a Subset of MEF-Associated Genes

To establish the temporal requirements of EMHT activity during reprogramming, we next exposed OKSM-expressing cells at specific intervals of time to UNC0638. We adjusted the intervals of exposure (1 day for 3c and 2 days for basal reprogramming) to reflect the substantially faster kinetics



of 3c enhanced reprogramming (Vidal et al., 2014). This revealed that the reprogramming-promoting effect of EHMT inhibition on basal reprogramming, as well as the reprogramming-counteracting effect of EHMT inhibition on 3c enhanced reprogramming, was most pronounced when UNC0638 was administered during early reprogramming stages (days 0–4 during basal and days 0–2 during 3c enhanced reprogramming) (Figure 2C).

To gain insight into the genome-wide molecular consequences of EHMT inhibition during the early stages of iPSC formation we used RNA sequencing (RNA-seq), which clearly distinguished MEFs, basal intermediates, and 3c enhanced intermediates (Figure S3A). Unsupervised k-means clustering of genes differentially expressed between starting MEFs and cells 2 days after initiation of OKSM expression under either condition revealed five distinct groups (Figure 3A and Table S1). Three of these groups contained mostly genes expressed more highly in MEFs than in established iPSCs (fold change > 2; adjusted  $p < 0.05$ ) that were downregulated early during reprogramming (clusters 1, 3, and 4), while the two other groups contained larger fractions of iPSC-associated genes that were already upregulated at this stage of iPSC formation (clusters 2 and 5) (Figure 3A). Gene ontology (GO) analysis revealed stronger activation of genes involved in RNA metabolism and translation (cluster 5) and more efficient silencing of genes required for cell adhesion (cluster 4) during 3c enhanced reprogramming (Figure 3A and Table S1). Direct comparison of differentially expressed genes between early intermediates of the two different reprogramming conditions confirmed more efficient downregulation of transcripts associated with cell adhesion and extracellular matrix organization during 3c enhanced reprogramming (Table S2). These observations demonstrate that basal and 3c enhanced reprogramming exhibit distinct molecular characteristics during early stages of iPSC formation.

Next, we interrogated the consequences of EHMT inhibition on the transcriptional dynamics associated with the two different reprogramming regimens. Principal-component analysis (PCA) of early reprogramming intermediates confirmed close proximity of biological replicates and suggested a more pronounced effect of UNC0638 on 3c enhanced than on basal reprogramming (Figure S3B). Differential gene expression analysis confirmed this observation and identified a total of 456 genes associated with 3c enhanced reprogramming that were significantly altered (fold change > 1.5; adjusted  $p < 0.05$ ) in the presence of UNC0638 (Table S3). In agreement with the established roles of EHMTs as transcriptional repressors, we observed more frequent gene activation upon inhibition of these enzymes (408 of 456 genes or 89.5%). Only 44 (or 9.7%) of the 456 genes affected during 3c enhanced reprogramming were also affected in their expression by UNC0638 treat-

ment during basal reprogramming (Table S3). Analysis of affected genes in the aforementioned five clusters revealed that EHMT inhibition counteracted the downregulation of a subset of genes in the MEF-enriched clusters 1, 3, and 4, while minimally affecting the iPSC-related clusters 2 and 5 (Figures 3B and S3C). Overall, we found that the majority of genes upregulated in the presence of UNC0638 during 3c enhanced reprogramming (328 of 408 genes or 80.4%) were MEF associated. We will refer to this group of transcripts as “insufficiently silenced genes” (ISGs) (Figure 3C). GO analysis showed that ISGs represent biological processes such as biological adhesion and extracellular matrix remodeling (Figure 3D and Table S3). Together, these observations suggest that EHMTs during 3c enhanced reprogramming contribute to the silencing of somatic gene expression during iPSC formation.

### Rapid Loss of H3K9me2 upon EHMT Inhibition during 3c Enhanced Reprogramming

We next evaluated the global levels of H3K9me2 by chromatin immunoprecipitation with massively parallel sequencing (ChIP-seq) in starting fibroblasts and early (48 h) reprogramming intermediates. PCA revealed distinct clustering of all four reprogramming conditions (basal and 3c enhanced, with and without UNC0638) (Figure S3D). Integration of RNA-seq data revealed an inverse correlation between expression levels of gene loci and their H3K9me2 intensity in the respective samples (shown for MEFs in Figure S3E), in agreement with the reported repressive nature of this mark. Consistent with our IF analyses (Figures 1D and S1D), ChIP-seq showed a genome-wide increase in H3K9me2 levels in reprogramming intermediates and a marked decrease in the presence of UNC0638 that was significantly more pronounced during 3c enhanced reprogramming (Figure 3E). This increase in H3K9me2 was not restricted to downregulated genes. Similarly, the loss of this mark in the presence of UNC0638 extended beyond genes that were transcriptionally affected in early reprogramming intermediates by EHMT inhibition (Table S4). These observations argue against a simple correlation between the dynamics of global H3K9me2 changes and transcriptional output, at least during the early stages of iPSC formation we analyzed.

Next, we tested whether alterations in H3K9me2 levels could explain the insufficient silencing of specific MEF-associated genes during 3c reprogramming in the presence of UNC0638. We therefore focused on the 328 ISGs (Figure 3C and Table S3) and a control group of 2,664 MEF-associated genes that are equally efficiently downregulated in the absence and presence of EHMT inhibition (fold change between 0.9 and 1.1). Although both gene groups gained H3K9me2 compared with MEFs during reprogramming, ISGs on average showed significantly higher levels

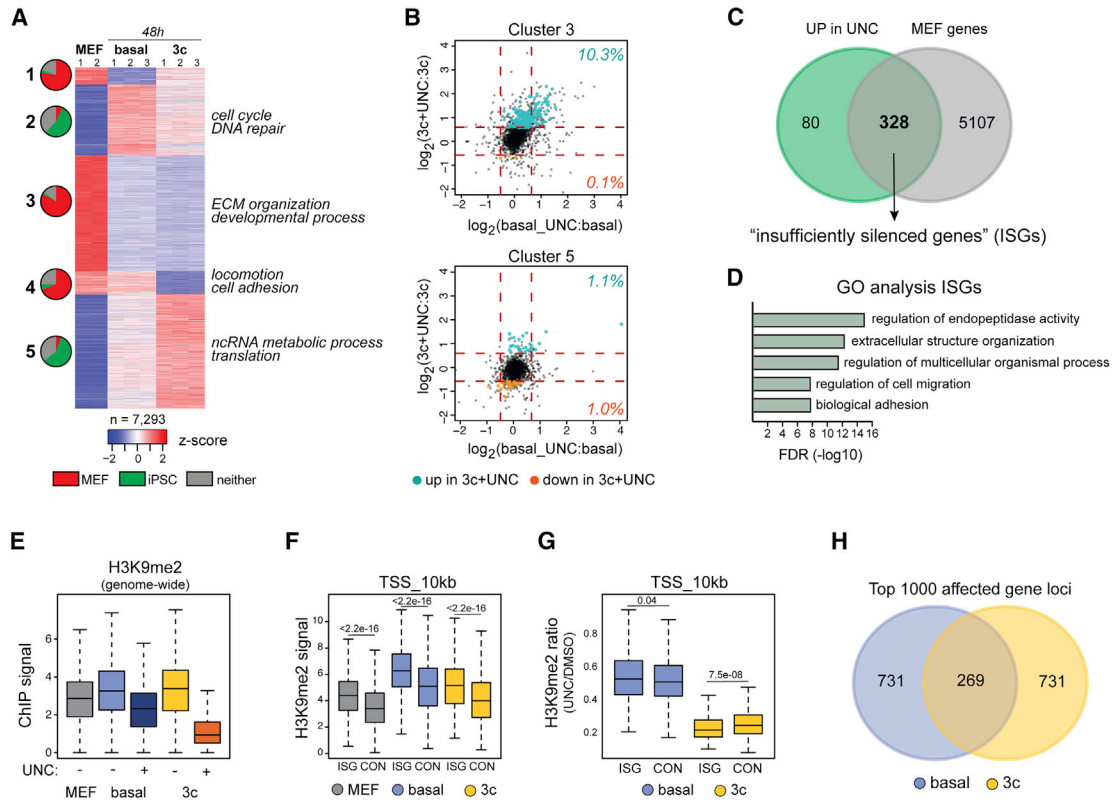

### Figure 3. Molecular Consequences of EHMT Inhibition during Early Reprogramming Stages

- (A) Unsupervised k-means clustering of genes differentially expressed between MEFs and cells expressing OKSM for 2 days under either basal or 3c conditions (adjusted  $p < 0.05$ ; fold change [FC]  $> 2$ ). Pie charts indicate the abundance of genes associated with either MEFs or iPSCs (adjusted  $p < 0.05$ ; FC  $> 2$ ) or neither cell type in the respective cluster. Select GO categories (false discovery rate [FDR]  $< 0.05$ ) associated with identified clusters are highlighted.
- (B) Effects of EHMT inhibition (UNC) on the expression levels of genes associated with cluster 3 (top) and cluster 5 (bottom) identified in (A) during both basal (x axis) and 3c enhanced (y axis) reprogramming. Transcripts with significantly changed abundance during 3c enhanced reprogramming (adjusted  $p < 0.05$ ; FC  $> 1.5$ ) are highlighted in green (failed downregulation) and orange (failed upregulation), respectively. Percentage of affected cluster-specific genes is shown.
- (C) Venn diagram showing overlap between genes upregulated during 3c enhanced reprogramming in the presence of UNC0638 and genes significantly more highly expressed in MEFs than in iPSCs.
- (D) GO terms associated with MEF-associated genes that are inefficiently silenced during 3c enhanced reprogramming in the presence of UNC0638 (ISGs).
- (E) H3K9me2 ChIP signal across 2.5-kb tiling intervals across the mouse genome. Average values from two separate chromatin precipitations are shown for each of the indicated conditions.
- (F) H3K9me2 ChIP signal over the 10 kb immediately upstream of the TSS in ISGs in the presence of UNC0638 during 3c reprogramming and 2,664 control MEF-associated genes that are efficiently silenced (CON).  $n = 2$  independent experiments.
- (G) Ratio of H3K9me2 signal in the presence and absence of UNC0638 at the TSS region of ISGs and control genes during basal and 3c reprogramming. Indicated p values in (F and G) were calculated with Wilcoxon rank-sum test.  $n = 2$  independent experiments.
- (H) Overlap of the 1,000 protein-coding gene loci with the highest degree of loss of H3K9me2 signal upon EHMT inhibition during basal and 3c reprogramming.

of this chromatin mark both immediately upstream of the transcription start site (TSS) (Figure 3F) and across the gene body (Figure S3F). Although both ISGs and control genes exhibited a drastic decrease in H3K9me2 levels upon UNC treatment (~50% in basal and ~80% in 3c-enhanced reprogramming), ISGs experienced a stronger loss of this

mark, in particular under 3c conditions (Figures 3G and S3G). When we compared gene loci that were most strongly affected in their H3K9me2 levels by EHMT inhibition during either basal or 3c enhanced reprogramming, we observed limited overlap and distinct GO terms (Figures 3H and S3H and Table S4). Together, these experiments reveal



widespread remodeling of H3K9me2 during early stages of iPSC formation and demonstrate both quantitative and qualitative differences with respect to target loci affected by EHMT inhibition during basal and 3c enhanced reprogramming. [Figure S3I](#) highlights H3K9me2 changes at select MEF-associated gene loci.

### Interference with EHMT Activity Affects Intermediate and Late Markers of Reprogramming

We turned to microscopy and flow cytometry to assess how EHMT inhibition affects later stages of iPSC formation. Visualization of 3c enhanced reprogramming intermediates labeled with a strong, dox-dependent EGFP viral transgene revealed a pronounced reduction in nascent colonies with epithelial features and a concomitant increase in colonies that consisted exclusively of cells retaining fibroblastic morphology in the presence of UNC0638 ([Figures 4A and 4B](#)). This correlated with reduced numbers of intermediate cells expressing the epithelial surface markers CDH1 (also known as E-cadherin) and EpCAM (also known as CD326) ([Figure 4C](#)). In addition, the intermediate cells that successfully upregulated CDH1 retained elevated levels of the fibroblast surface marker THY1 ([Figures S4A and S4B](#)). In contrast, EHMT inhibition during basal reprogramming led to a significant increase in intermediate cells expressing CDH1 and EpCAM ([Figure 4D](#)). The relative abundance of late reprogramming intermediates (measured at day 6 during 3c and at day 12 during basal reprogramming) that had reactivated expression of endogenous *Oct4* was about 2-fold increased in 3c enhanced reprogramming and 20-fold increased in basal reprogramming ([Figures 4C and 4D](#)). These observations indicate that EHMT inhibition facilitates the reactivation of endogenous pluripotency loci, in particular under basal conditions, but under 3c enhanced conditions counteracts the efficient transition of reprogrammable fibroblasts to the intermediate, epithelialized stages of iPSC formation.

Interestingly, the short hairpin RNA (shRNA)-mediated knockdown (KD) of *Ehmt1* recapitulated the reprogramming-inhibiting effect of UNC0638 treatment during 3c enhanced reprogramming, while KD of *Ehmt2* recapitulated the reprogramming-promoting effect of EHMT inhibition during basal reprogramming ([Figures 4E and 4F](#)), suggesting different and context-dependent functions of these enzymes during iPSC formation. Quantitative PCR confirmed a similar degree of specificity and efficiency of the shRNAs used to interfere with the EHMTs ([Figure S4C](#)). However, WB showed that loss of EHMT1 was associated with strongly reduced levels of EHMT2 protein but not vice versa ([Figure S4D](#)). This suggests that EHMT1 stabilizes EHMT2 in reprogramming intermediates, as has been previously reported for mouse embryonic stem cells ([Tachibana et al., 2005](#)), while EHMT1 is independent of

EHMT2 levels. In addition to destabilization of EHMT2, KD of *Ehmt1* but not *Ehmt2* reduced the levels of H3K9me2 in early reprogramming intermediates, while H3K9me1 and H3K9me3 appeared unaffected ([Figure S4E](#)). These observations suggest that 3c enhanced reprogramming intermediates can compensate for a significant reduction in EHMT2 but not in EHMT1 levels, which might help explain the different effects that *Ehmt1* and *Ehmt2* KD has on the efficiency of iPSC formation ([Figures 4E and 4F](#)).

### Evidence for a Balance between EHMT Activity and AA-Stimulated Enzymes during Reprogramming

Next, we sought to investigate whether a specific component of the 3c mixture (AA, iALK5, and CHIR99021) is responsible for the reduction in iPSC formation observed upon EHMT inhibition. Reprogramming experiments conducted in the presence of single compounds revealed a significant reduction in iPSC colonies when UNC0638 was used together with AA ([Figures 5A and 5B](#)). In contrast, a slight increase in colony numbers was observed when EHMTs were inhibited in the presence of either CHIR99021 or iALK5, although this was not significant in all experiments conducted with CHIR99021 ([Figure 5B](#)). The fold-change reduction in colony numbers observed in the presence of AA alone was less dramatic than in the context of 3c conditions, raising the possibility that AA might synergize with one or both of the other two reprogramming enhancing compounds in establishing a requirement for EHMT activity. Indeed, iPSC colony numbers were strongly reduced when AA was combined with either iALK5 or CHIR99021 in the presence of UNC0638 ([Figure 5C](#)). Colony numbers remained unchanged when iALK5 was combined with CHIR99021 in the absence of AA ([Figure 5C](#)), suggesting that not all approaches to enhancing reprogramming efficiencies acquire dependence on EHMT activity.

EHMT inhibition has been reported to counteract cellular proliferation in cancer cells ([Casciello et al., 2015](#)). In light of the importance of the proliferative potential for iPSC formation ([Li et al., 2009](#); [Utikal et al., 2009](#)), we asked whether this might contribute to the observed reduction in colonies. Quantification of cells at early reprogramming stages revealed reduced cell numbers in the presence of UNC0638 under all conditions, including those where EHMT inhibition favors reprogramming ([Figure S5A](#)). This suggests that an effect on proliferation is unlikely to explain the reduction in iPSC reprogramming observed only under specific conditions.

AA has been recognized as a potent cofactor and stimulant of the enzymatic activity of chromatin-modifying enzymes ([Cimmino et al., 2018](#); [Monfort and Wutz, 2013](#)), in particular of histone and DNA demethylases. Therefore, we attempted to restore efficient reprogramming in the

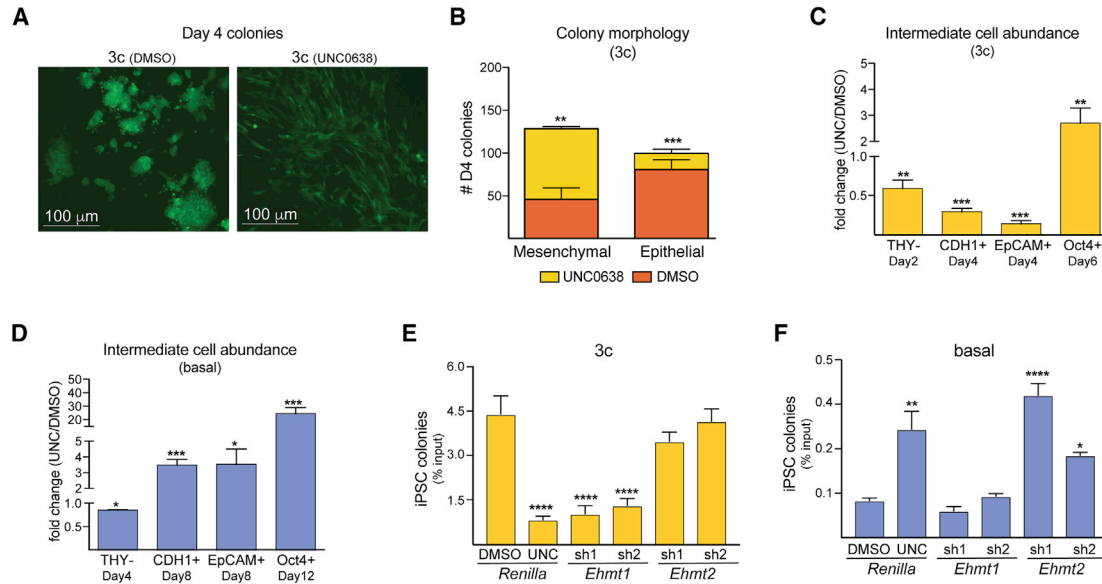

**Figure 4. Impact of EHMT Inhibition on Later Stages of iPSC Reprogramming**

(A) Representative images of colonies formed upon 4 days of OKSM expression under 3c conditions in the absence (DMSO) or presence of UNC0638. Starting MEFs were labeled with a lentiviral vector expressing EGFP to visualize colony morphology.

(B) Quantification of day 4 colonies with mesenchymal or epithelial morphology under the indicated conditions. Significance with multiple two-tailed t tests: \*\* $p < 0.01$  and \*\*\* $p < 0.001$ . At least 100 colonies were scored in three separate reprogramming experiments for each condition.

(C) Relative abundance in the presence versus absence of UNC0638 (UNC) of the indicated reprogramming intermediates during 3c enhanced reprogramming, as measured by flow cytometry.  $n = 3$  independent experiments.

(D) Same as (C) for reprogramming intermediates during basal reprogramming.  $n = 3$  independent experiments. Significance in (C and D) with multiple t tests using Holm-Sidak correction: \* $p < 0.05$ , \*\* $p < 0.01$ , and \*\*\* $p < 0.001$ .

(E) Percentage of stable iPSC colonies (per input MEFs) formed under 3c reprogramming conditions from cells transduced with indicated shRNAs.

(F) Like (E) but under basal reprogramming conditions.

Significance in (E and F) was calculated with one-way ANOVA with Tukey post test: \* $p < 0.05$ , \*\* $p < 0.01$ , and \*\*\*\* $p < 0.0001$ .  $n = 3$  independent experiments.

presence of UNC0638 by shRNA-mediated KD of AA-stimulated H3K9 demethylases. Interference with KDM3B, which has recently been reported to be the main modulator of H3K9me2 downstream of AA in established pluripotent stem cells (Ebata et al., 2017), strongly impaired basal reprogramming but slightly increased colony numbers during 3c enhanced reprogramming in the absence of UNC0638 (Figure S5B). Interference with KDM3B also ameliorated the reduction in iPSC colony formation during 3c enhanced reprogramming in the presence of UNC0638 (Figure S5C). The incomplete rescue observed may suggest the involvement of additional enzymes or other regulators. KD of *Kdm3a* had no significant effect on any reprogramming condition assessed (Figures S5B and S5C), despite a similar reduction in mRNA and protein levels (Figures S5D and S5E). Together, these observations further support context-dependent functions of the H3K9 methylation and demethylation machinery during iPSC formation.

We have previously shown that 3c reprogramming yields iPSCs that pass the most stringent functional assays (Amrani et al., 2018), raising the question whether EHMT activity is required to generate developmentally highly competent iPSCs by this method. We observed no differences in the morphology or expression of endogenous *Oct4* between iPSCs that were derived using 3c enhanced reprogramming in either the absence or the presence of UNC0638 (Figures S5F and S5G). However, when conducting tetraploid blastocyst injections with iPSCs derived from cells exposed to UNC0638 during the first 48 h of 3c enhanced reprogramming, we obtained significantly reduced numbers of viable pups compared with control iPSCs (Figures 5D and 5E). To further investigate the reasons for this observation, we initially analyzed the imprinting status of *Dlk1-Dio3*, since loss of imprinting (LOI) at this gene cluster frequently occurs during basal reprogramming and results in developmentally impaired

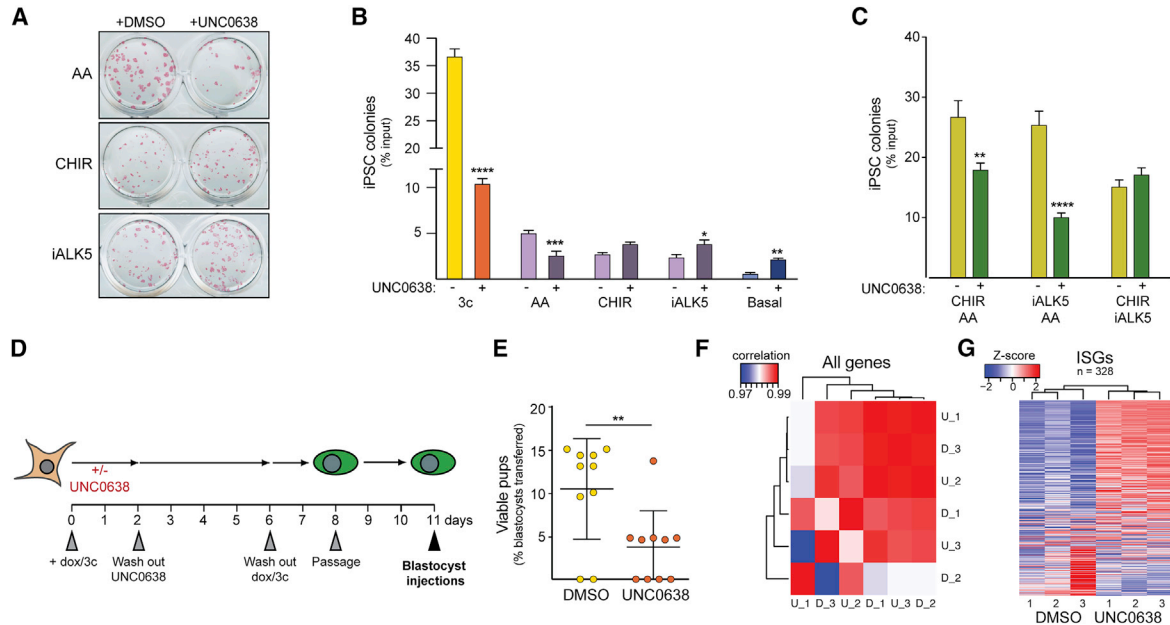

**Figure 5. AA Establishes a Requirement for EHMT Activity during Enhanced iPSC Reprogramming**

(A) Alkaline phosphatase staining of transgene-independent iPSC colonies obtained after reprogramming MEFs in the presence of the indicated compounds in the absence or presence of UNC0638.

(B) Quantification of iPSC colonies formed under the indicated conditions.  $n = 3$  independent reprogramming experiments.

(C) Quantification of iPSC colonies formed in the presence of the indicated dual-compound conditions.

$n = 3$  independent reprogramming experiments. Significance in (B and C) was calculated by two-way ANOVA with Sidak post test with adjusted  $p$  values of  $*p < 0.05$ ,  $**p < 0.01$ ,  $***p < 0.001$ , and  $****p < 0.0001$ .

(D) Schematic of the approach taken to test for potential functional deficits of iPSCs caused by transient EHMT inhibition during reprogramming.

(E) Quantification of viable pups obtained after blastocyst injection with the indicated iPSCs. Each circle represents the offspring obtained from one recipient female ( $n = 10$  for each condition) of 20 injected blastocysts.  $**p < 0.01$  with Mann-Whitney test. Lines show mean with SD.

(F) Heatmap of Pearson's correlation coefficient for all expressed genes between three iPSC cultures derived in the presence of UNC0638 under 3c conditions and three iPSC cultures derived in the absence of UNC0638.

(G) Heatmap of the expression levels (RPKM) of the 328 ISGs (see Figure 3C) in established iPSCs derived in either the absence or the presence of UNC0638.

iPSCs (Carey et al., 2011; Stadtfeld et al., 2010a), but is normally not observed after 3c enhanced reprogramming (Swanzy and Stadtfeld, 2016). Analysis of iPSCs carrying a sensitive fluorescent reporter system for imprint stability at *Dlk1* revealed a very low degree of LOI in 3c iPSCs derived in either the absence or the presence of UNC0638 (Figures S5H and S5I). This argues against a causal role of dysregulation at *Dlk1-Dio3* for the observed reduced survival of mice obtained from 3c UNC iPSCs. Next, we subjected the iPSC lines used for blastocyst injections to RNA-seq analysis, which was performed at P3 (injections had been performed at P1). PCA confirmed an overall very high degree of similarity between iPSCs independent of derivation regimen (Figure 5F). However, when we focused on the 328 MEF-associated genes that failed to be efficiently downregulated in early reprogramming intermediates upon UNC0638

treatment (ISGs) (Figure 3C), the iPSCs clustered by treatment group, revealing elevated expression levels of a substantial subset of these genes in cells derived in the presence of compound (Figure 5G). Together, these observations suggest that even transient treatment with UNC0638 during reprogramming can have lasting molecular consequences in iPSCs that interfere with the developmental potential of these cells or the proper function of derivative tissues.

## DISCUSSION

A plethora of experimental evidence has demonstrated that H3K9 methyltransferases can counteract the induction of pluripotency *ex vivo*. By studying the consequences





of EHMT inhibition in two well-defined reprogramming conditions, our work provides several lines of insight into how interference with the H3K9 methylation machinery can affect cellular and molecular changes during iPSC formation.

First, our work confirms that counteracting H3K9 methylation facilitates reactivation of the *Pou5f1* locus (Chen et al., 2013b; Sridharan et al., 2013), which is consistent with the developmental role of EHMT2 (Feldman et al., 2006). Second, EHMTs appear to be involved in the early downregulation of fibroblast-associated genes, indicating that H3K9 methyltransferases can contribute to the early silencing of the somatic program (Li et al., 2017). Why this effect is restricted to specific loci remains to be determined, but the observation that gene loci transcriptionally affected by UNC0638 administration exhibit higher levels of H3K9me2 methylation already in fibroblasts suggests that this chromatin modification might be of special importance for the regulation of these genes. The dramatic, genome-wide drop in H3K9me2 upon EHMT inhibition during 3c enhanced reprogramming might lower the levels of this chromatin mark at specific gene loci below a threshold required for appropriate regulation. The more pronounced loss of H3K9me2 during enhanced reprogramming might be due to the enzymatic stimulation of histone demethylases by AA or the faster cell cycle under these conditions. The observation that H3K9me2 levels at different gene loci are most strongly affected in basal and 3c reprogramming could be due to context-dependent upregulation or stabilization of a protein cofactor that recruits EHMTs to specific gene loci, as has been reported for MYC in cancer cells (Tu et al., 2018). Third, EHMTs can exert context-dependent functions during the mesenchymal-to-epithelial transition necessary for reprogramming (Li et al., 2010; Samavarchi-Tehrani et al., 2010). In basal reprogramming, chemical inhibition of EHMT facilitates the upregulation of epithelial markers such as CDH1 and EpCAM, suggesting that H3K9 methylation contributes to the stable silencing of additional pluripotency-associated gene loci in somatic cells beyond *Pou5f1*. In striking contrast, EHMT inhibition counteracts epithelization during our enhanced reprogramming approach. This might be a consequence of the impaired silencing of fibroblast-associated gene loci discussed above or reflective of interference with other aspects of the molecular change that distinguish enhanced from basal reprogramming, such as the much more dramatic alterations in H3K9me2 patterns.

The requirement for EHMT activity during enhanced reprogramming appears to be caused by AA. To our knowledge, none of the prior studies reporting facilitated reprogramming upon interference with the EHMTs utilized AA, explaining why this interaction has been missed. In addition,

most efforts to improve iPSC formation by interfering with H3K9 methylation were done at late stages during reprogramming or by using partially reprogrammed cells (Chen et al., 2013b; Sridharan et al., 2013; Tran et al., 2015). Of note, a genetic screen for epigenetic regulators conducted during human iPSC formation (which are routinely derived and cultured in the presence of AA) reported reduced reprogramming efficiencies upon KD of EHMT1 (Onder et al., 2012). To explain the context-dependent consequences of EHMT inhibition, we propose that a balance between these histone methyltransferases and AA-stimulated enzymes such as KDM3B is important for iPSC reprogramming. The concept of a functional balance between H3K9 methyltransferases and AA-stimulated enzymes might help develop new strategies targeting diseases driven by the dysregulation of chromatin-modifying enzymes. Of note, the impact of TET1 on the success of iPSC formation is also modulated by the presence of AA (Chen et al., 2013a), raising the possibility that DNA demethylases might functionally interact with H3K9 methyltransferases and demethylases during enhanced reprogramming. Of note, *Tet1* expression was linked to H3K9 demethylase activity during the conversion of partially into fully reprogrammed iPSCs (Tran et al., 2019), supporting the interplay of DNA and histone methylation during reprogramming. It is noteworthy that our results strongly suggest that EHMT1 and EHMT2 have at least partially different roles during fibroblast reprogramming. These enzymes predominantly function as a heterodimer in embryonic stem cells (Tachibana et al., 2005), while distinct functions of these methyltransferases have been reported in other cell types (Battisti et al., 2016).

Our data also suggest that even transient inhibition of H3K9me2 methyltransferase activity during reprogramming can result in impaired iPSC function, suggesting the introduction of persistent epigenetic aberrations. The precise molecular abnormalities caused by EHMT inhibition remain to be determined, but this observation represents a cautionary note for potential undesired consequences when targeting chromatin modifiers to facilitate iPSC formation. In conclusion, our results show that H3K9 methyltransferases can function as flexible regulators of cellular reprogramming that influence not only molecular change during the process, but also the properties of resultant iPSCs.

## EXPERIMENTAL PROCEDURES

### Mice

Derivation, handling, and genotyping of reprogrammable mice (JAX011001) with the *Oct4-GFP* allele were described previously (Stadtfield et al., 2010b). All animal experiments were in accordance with the guidelines of the NYU School of Medicine Institutional Animal Care and Use Committee.

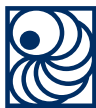

## Basic Cell Culture and Cell Culture-Based Assays

Reprogrammable MEFs were heterozygous for *Rosa26-rtTA* and for *Oct4-GFP* and either heterozygous for an inducible OKSM allele (Stadtfield et al., 2010b) or homozygous for an inducible OKS allele (Borkent et al., 2016). Culture of MEFs and iPSCs and reprogramming experiments were conducted as previously described (Vidal et al., 2014). If applicable, UNC0638 (1  $\mu$ M) was added.

## Immunofluorescence

The following primary antibodies were used: H3K9me1 (ab9045; 1:200), H3K9me2 (ab1220; 1:200), H3K9me3 (ab8898; 1:200), H3K4me2 (ab7766; 1:200), H3K4me3 (ab8580; 1:200), EHMT1 (ab41969; 1:200), and EHMT2 (C6H3, 1:50).

## Tetraploid Blastocyst Injections

Embryo injections were conducted with 5–10 iPSCs per blastocyst as previously described (Stadtfield et al., 2012).

## shRNA-Mediated Knockdown

Oligonucleotides against specific target genes were designed using the splashRNA algorithm (Pelossof et al., 2017) and are listed in Table S5.

## Lentiviral Reprogramming

Reprogramming was carried out with dox-inducible mouse OKSM (Sommer et al., 2009) and rtTA (FUdeltaGW-rtTA, Addgene, 19780) (Maherali et al., 2008) lentiviruses.

## Flow Cytometry

Single-cell suspensions were incubated with eFluor 450-conjugated anti-THY1 (53-2.1), biotin-conjugated anti-CDH1 (DECMA-1), and PE/Cy7-conjugated anti-EpCAM (G8.8), followed by incubation with streptavidin-APC (all eBiosciences).

## Western Blot Analysis

The following antibodies were used: EHMT1 (Ab41969) 1:1,000, EHMT2 (C6H3) 1:800, H3K9me2 (Ab8896) 1:800, H3K9me2 (Ab1220) 1:800, H3K9me3 (Ab8898) 1:800, H3 (Ab1791) 1:1,000, KDM3A (12835-1-AP) 1:500, and KDM3B (19915-1-AP) 1:500.

## RNA-Seq Library Preparations and Analysis

Total RNA was subjected to Automated TruSeq stranded total RNA with RiboZero Gold library preparation (Illumina) and sequencing with a HiSeq 2500. Reads were aligned to differentially expressed genes identified with DESeq (Anders and Huber, 2010). GO analysis was conducted using Gorilla (Eden et al., 2009) and REVIGO (Supek et al., 2011).

## ChIP-Seq

Native ChIP-seq was performed with 10 million cells as previously described (Chen et al., 2018), using H3K9me2 antibody (Abcam, ab1220) and Protein G Dynabeads. Libraries were prepared using the KAPA HyperPrep Kit (Roche) and sequenced (paired-end 50) on an Illumina HiSeq 4000.

## ChIP-Seq Analysis

Alignment of sequenced reads (Langmead et al., 2009) and enrichment analysis of ChIP signal (Quinlan and Hall, 2010) were performed as described.

## Data and Code Availability

Raw RNA-seq and ChIP-seq data were submitted to Gene Expression Omnibus under accession number GEO: GSE130490.

## SUPPLEMENTAL INFORMATION

Supplemental Information can be found online at <https://doi.org/10.1016/j.stemcr.2020.08.011>.

## AUTHOR CONTRIBUTIONS

S.V. and M.S. conceived the study and supervised data analysis. S.V. performed the initial characterization of the effect of EHMT inhibition on reprogramming, conducted reprogramming experiments, and optimized and conducted the isolation of reprogramming intermediates for RNA-seq. A.P. conducted bioinformatic analysis with the support of Y.G. and A.T. K.C. conducted WB analysis and reprogramming experiments, L.E. isolated material for ChIP-seq, E.S. quantified the effect of EHMT inhibition of *Dkl1* imprinting, J.M.V. conducted reprogramming experiments with individual compounds, H.W. generated and validated knockdown constructs, C.P. and B.A. provided cell lines and other reagents, V.S. and J.A.S. assisted with RNA-seq, S.T. advised on the biology of histone methyltransferases, S.K. conducted blastocyst injections, E.A. was involved in experimental planning and supervised data analysis, and M.S. conducted reprogramming, flow cytometry, and IF experiments and wrote the manuscript with input from all other authors.

## ACKNOWLEDGMENTS

We thank Konrad Hochedlinger and current and past members of the Stadtfield and Apostolou labs for helpful suggestions on the manuscript and during the course of this project. We are grateful to the Cytometry and Cell Sorting Laboratory and the Genomics Core at NYU Langone for expert help with our experiments and the Sfeir lab for help with cell counting and for being excellent neighbors. We thank Carol Chen and Matthew Lorincz for expert advice on H3K9me2 ChIP-seq. M.S. was supported by the National Institutes of Health (1R01GM111852-01). L.E. is a New York Stem Cell Foundation–Druckenmiller Fellow. This research was supported by the New York Stem Cell Foundation.

Received: June 21, 2019

Revised: August 22, 2020

Accepted: August 25, 2020

Published: September 24, 2020

## REFERENCES

Amlani, B., Liu, Y., Chen, T., Ee, L.S., Lopez, P., Heguy, A., Apostolou, E., Kim, S.Y., and Stadtfield, M. (2018). Nascent induced pluripotent stem cells efficiently generate entirely iPSC-derived mice

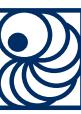

- while expressing differentiation-associated genes. *Cell Rep.* 22, 876–884.
- Anders, S., and Huber, W. (2010). Differential expression analysis for sequence count data. *Genome Biol.* 11, R106.
- Battisti, V., Pontis, J., Boyarchuk, E., Fritsch, L., Robin, P., Ait-Si-Ali, S., and Joliot, V. (2016). Unexpected distinct roles of the related histone H3 lysine 9 methyltransferases G9a and G9a-like protein in myoblasts. *J. Mol. Biol.* 428, 2329–2343.
- Becker, J.S., Nicetto, D., and Zaret, K.S. (2016). H3K9me3-dependent heterochromatin: barrier to cell fate changes. *Trends Genet.* 32, 29–41.
- Benevento, M., van de Molengraft, M., van Westen, R., van Bokhoven, H., and Kasri, N.N. (2015). The role of chromatin repressive marks in cognition and disease: a focus on the repressive complex GLP/G9a. *Neurobiol. Learn Mem.* 124, 88–96.
- Black, J.C., Van Rechem, C., and Whetstine, J.R. (2012). Histone lysine methylation dynamics: establishment, regulation, and biological impact. *Mol. Cell* 48, 491–507.
- Borkent, M., Bennett, B.D., Lackford, B., Bar-Nur, O., Brumbaugh, J., Wang, L., Du, Y., Fargo, D.C., Apostolou, E., Cheloufi, S., et al. (2016). A serial shRNA screen for roadblocks to reprogramming identifies the protein modifier SUMO2. *Stem Cell Rep.* 6, 704–716.
- Carey, B.W., Markoulaki, S., Hanna, J.H., Faddah, D.A., Buganim, Y., Kim, J., Ganz, K., Steine, E.J., Cassady, J.P., Creighton, M.P., et al. (2011). Reprogramming factor stoichiometry influences the epigenetic state and biological properties of induced pluripotent stem cells. *Cell Stem Cell* 9, 588–598.
- Casciello, F., Windloch, K., Gannon, F., and Lee, J.S. (2015). Functional role of G9a histone methyltransferase in cancer. *Front. Immunol.* 6, 487.
- Chen, C.C.L., Goyal, P., Karimi, M.M., Abildgaard, M.H., Kimura, H., and Lorincz, M.C. (2018). H3S10ph broadly marks early-replicating domains in interphase ESCs and shows reciprocal antagonism with H3K9me2. *Genome Res.* 28, 37–51.
- Chen, J., Guo, L., Zhang, L., Wu, H., Yang, J., Liu, H., Wang, X., Hu, X., Gu, T., Zhou, Z., et al. (2013a). Vitamin C modulates TET1 function during somatic cell reprogramming. *Nat. Genet.* 45, 1504–1509.
- Chen, J., Liu, H., Liu, J., Qi, J., Wei, B., Yang, J., Liang, H., Chen, Y., Chen, J., Wu, Y., et al. (2013b). H3K9 methylation is a barrier during somatic cell reprogramming into iPSCs. *Nat. Genet.* 45, 34–42.
- Cimmino, L., Neel, B.G., and Aifantis, I. (2018). Vitamin C in stem cell reprogramming and cancer. *Trends Cell Biol.* 28, 698–708.
- Dakhore, S., Nayer, B., and Hasegawa, K. (2018). Human pluripotent stem cell culture: current status, challenges, and advancement. *Stem Cells Int.* 2018, 7396905.
- Ebata, K.T., Mesh, K., Liu, S., Bilenky, M., Fekete, A., Acker, M.G., Hirst, M., Garcia, B.A., and Ramalho-Santos, M. (2017). Vitamin C induces specific demethylation of H3K9me2 in mouse embryonic stem cells via Kdm3a/b. *Epigenetics Chromatin* 10, 36.
- Eden, E., Navon, R., Steinfeld, I., Lipson, D., and Yakhini, Z. (2009). GOrilla: a tool for discovery and visualization of enriched GO terms in ranked gene lists. *BMC Bioinformatics* 10, 48.
- Epsztejn-Litman, S., Feldman, N., Abu-Remaileh, M., Shufaro, Y., Gerson, A., Ueda, J., Deplus, R., Fuks, F., Shinkai, Y., Cedar, H., et al. (2008). De novo DNA methylation promoted by G9a prevents reprogramming of embryonically silenced genes. *Nat. Struct. Mol. Biol.* 15, 1176–1183.
- Feldman, N., Gerson, A., Fang, J., Li, E., Zhang, Y., Shinkai, Y., Cedar, H., and Bergman, Y. (2006). G9a-mediated irreversible epigenetic inactivation of Oct-3/4 during early embryogenesis. *Nat. Cell Biol.* 8, 188–194.
- Kang, Y.K. (2015). SETDB1 in early embryos and embryonic stem cells. *Curr. Issues Mol. Biol.* 17, 1–10.
- Kirshner, Z.Z., and Gibbs, R.B. (2018). Use of the REVERT((R)) total protein stain as a loading control demonstrates significant benefits over the use of housekeeping proteins when analyzing brain homogenates by Western blot: an analysis of samples representing different gonadal hormone states. *Mol. Cell Endocrinol.* 473, 156–165.
- Koche, R.P., Smith, Z.D., Adli, M., Gu, H., Ku, M., Gnirke, A., Bernstein, B.E., and Meissner, A. (2011). Reprogramming factor expression initiates widespread targeted chromatin remodeling. *Cell Stem Cell* 8, 96–105.
- Kuroki, S., and Tachibana, M. (2018). Epigenetic regulation of mammalian sex determination. *Mol. Cell Endocrinol.* 468, 31–38.
- Langmead, B., Trapnell, C., Pop, M., and Salzberg, S.L. (2009). Ultrafast and memory-efficient alignment of short DNA sequences to the human genome. *Genome Biol.* 10, R25.
- Lengner, C.J., Camargo, F.D., Hochedlinger, K., Welstead, G.G., Zaidi, S., Gokhale, S., Scholer, H.R., Tomilin, A., and Jaenisch, R. (2007). Oct4 expression is not required for mouse somatic stem cell self-renewal. *Cell Stem Cell* 1, 403–415.
- Li, D., Liu, J., Yang, X., Zhou, C., Guo, J., Wu, C., Qin, Y., Guo, L., He, J., Yu, S., et al. (2017). Chromatin accessibility dynamics during iPSC reprogramming. *Cell Stem Cell* 21, 819–833 e6.
- Li, H., Collado, M., Villasante, A., Strati, K., Ortega, S., Canamero, M., Blasco, M.A., and Serrano, M. (2009). The Ink4/Arf locus is a barrier for iPS cell reprogramming. *Nature* 460, 1136–1139.
- Li, R., Liang, J., Ni, S., Zhou, T., Qing, X., Li, H., He, W., Chen, J., Li, F., Zhuang, Q., et al. (2010). A mesenchymal-to-epithelial transition initiates and is required for the nuclear reprogramming of mouse fibroblasts. *Cell Stem Cell* 7, 51–63.
- Liang, G., He, J., and Zhang, Y. (2012). Kdm2b promotes induced pluripotent stem cell generation by facilitating gene activation early in reprogramming. *Nat. Cell Biol.* 14, 457–466.
- Maherali, N., Ahfeldt, T., Rigamonti, A., Utikal, J., Cowan, C., and Hochedlinger, K. (2008). A high-efficiency system for the generation and study of human induced pluripotent stem cells. *Cell Stem Cell* 3, 340–345.
- Matoba, S., Liu, Y., Lu, F., Iwabuchi, K.A., Shen, L., Inoue, A., and Zhang, Y. (2014). Embryonic development following somatic cell nuclear transfer impeded by persisting histone methylation. *Cell* 159, 884–895.
- Monfort, A., and Wutz, A. (2013). Breathing-in epigenetic change with vitamin C. *EMBO Rep.* 14, 337–346.
- Onder, T.T., Kara, N., Cherry, A., Sinha, A.U., Zhu, N., Bernt, K.M., Cahan, P., Marcarci, B.O., Unternaehrer, J., Gupta, P.B., et al.



- (2012). Chromatin-modifying enzymes as modulators of reprogramming. *Nature* 483, 598–602.
- Pelossof, R., Fairchild, L., Huang, C.H., Widmer, C., Sreedharan, V.T., Sinha, N., Lai, D.Y., Guan, Y., Premririt, P.K., Tschaharganeh, D.F., et al. (2017). Prediction of potent shRNAs with a sequential classification algorithm. *Nat. Biotechnol.* 35, 350–353.
- Penalosa-Ruiz, G., Bousgouni, V., Gerlach, J.P., Waarlo, S., van de Ven, J.V., Veenstra, T.E., Silva, J.C.R., van Heeringen, S.J., Bakal, C., Mulder, K.W., et al. (2019). WDR5, BRCA1, and BARD1 Co-regulate the DNA damage response and modulate the mesenchymal-to-epithelial transition during early reprogramming. *Stem Cell Rep.* 12, 743–756.
- Peters, A.H., O'Carroll, D., Scherthan, H., Mechtler, K., Sauer, S., Schofer, C., Weipoltshammer, K., Pagani, M., Lachner, M., Kohlmaier, A., et al. (2001). Loss of the Suv39h histone methyltransferases impairs mammalian heterochromatin and genome stability. *Cell* 107, 323–337.
- Quinlan, A.R., and Hall, I.M. (2010). BEDTools: a flexible suite of utilities for comparing genomic features. *Bioinformatics* 26, 841–842.
- Rice, J.C., Briggs, S.D., Ueberheide, B., Barber, C.M., Shabanowitz, J., Hunt, D.F., Shinkai, Y., and Allis, C.D. (2003). Histone methyltransferases direct different degrees of methylation to define distinct chromatin domains. *Mol. Cell* 12, 1591–1598.
- Samavarchi-Tehrani, P., Golipour, A., David, L., Sung, H.K., Beyer, T.A., Datti, A., Woltjen, K., Nagy, A., and Wrana, J.L. (2010). Functional genomics reveals a BMP-driven mesenchymal-to-epithelial transition in the initiation of somatic cell reprogramming. *Cell Stem Cell* 7, 64–77.
- Saunders, A., Li, D., Faiola, F., Huang, X., Fidalgo, M., Guallar, D., Ding, J., Yang, F., Xu, Y., Zhou, H., et al. (2017). Context-dependent functions of NANOG phosphorylation in pluripotency and reprogramming. *Stem Cell Rep.* 8, 1115–1123.
- Scheer, S., and Zaph, C. (2017). The lysine methyltransferase G9a in immune cell differentiation and function. *Front. Immunol.* 8, 429.
- Schwarz, B.A., Cetinbas, M., Clement, K., Walsh, R.M., Cheloufi, S., Gu, H., Langkabel, J., Kamiya, A., Schorle, H., Meissner, A., et al. (2018). Prospective isolation of poised iPSC intermediates reveals principles of cellular reprogramming. *Cell Stem Cell* 23, 289–305 e285.
- Shankar, S.R., Bahirvani, A.G., Rao, V.K., Bharathy, N., Ow, J.R., and Taneja, R. (2013). G9a, a multipotent regulator of gene expression. *Epigenetics* 8, 16–22.
- Shi, Y., Do, J.T., Despons, C., Hahm, H.S., Scholer, H.R., and Ding, S. (2008). A combined chemical and genetic approach for the generation of induced pluripotent stem cells. *Cell Stem Cell* 2, 525–528.
- Shinkai, Y., and Tachibana, M. (2011). H3K9 methyltransferase G9a and the related molecule GLP. *Genes Dev.* 25, 781–788.
- Sommer, C.A., Stadtfeld, M., Murphy, G.J., Hochedlinger, K., Kotton, D.N., and Mostoslavsky, G. (2009). Induced pluripotent stem cell generation using a single lentiviral stem cell cassette. *Stem Cells* 27, 543–549.
- Soufi, A., Donahue, G., and Zaret, K.S. (2012). Facilitators and impediments of the pluripotency reprogramming factors' initial engagement with the genome. *Cell* 151, 994–1004.
- Sridharan, R., Gonzales-Cope, M., Chronis, C., Bonora, G., McKee, R., Huang, C., Patel, S., Lopez, D., Mishra, N., Pellegrini, M., et al. (2013). Proteomic and genomic approaches reveal critical functions of H3K9 methylation and heterochromatin protein-1gamma in reprogramming to pluripotency. *Nat. Cell Biol.* 15, 872–882.
- Stadtfeld, M., Apostolou, E., Akutsu, H., Fukuda, A., Follett, P., Natesan, S., Kono, T., Shioda, T., and Hochedlinger, K. (2010a). Aberrant silencing of imprinted genes on chromosome 12qF1 in mouse induced pluripotent stem cells. *Nature* 465, 175–181.
- Stadtfeld, M., Apostolou, E., Ferrari, F., Choi, J., Walsh, R.M., Chen, T., Ooi, S.S., Kim, S.Y., Bestor, T.H., Shioda, T., et al. (2012). Ascorbic acid prevents loss of Dlk1-Dio3 imprinting and facilitates generation of all-iPS cell mice from terminally differentiated B cells. *Nat. Genet.* 44, 398–405, S391–392.
- Stadtfeld, M., Maherali, N., Borkent, M., and Hochedlinger, K. (2010b). A reprogrammable mouse strain from gene-targeted embryonic stem cells. *Nat. Methods* 7, 53–55.
- Stelzer, Y., Shivalila, C.S., Soldner, F., Markoulaki, S., and Jaenisch, R. (2015). Tracing dynamic changes of DNA methylation at single-cell resolution. *Cell* 163, 218–229.
- Supek, F., Bosnjak, M., Skunca, N., and Smuc, T. (2011). REVIGO summarizes and visualizes long lists of gene ontology terms. *PLoS One* 6, e21800.
- Swaney, E., and Stadtfeld, M. (2016). A reporter model to visualize imprinting stability at the Dlk1 locus during mouse development and in pluripotent cells. *Development* 143, 4161–4166.
- Tachibana, M., Ueda, J., Fukuda, M., Takeda, N., Ohta, T., Iwanari, H., Sakihama, T., Kodama, T., Hamakubo, T., and Shinkai, Y. (2005). Histone methyltransferases G9a and GLP form heteromeric complexes and are both crucial for methylation of euchromatin at H3-K9. *Genes Dev.* 19, 815–826.
- Tran, K.A., Dillingham, C.M., and Sridharan, R. (2019). Coordinated removal of repressive epigenetic modifications during induced reversal of cell identity. *EMBO J.* 38, e101681.
- Tran, K.A., Jackson, S.A., Olufs, Z.P., Zaidan, N.Z., Leng, N., Kendziora, C., Roy, S., and Sridharan, R. (2015). Collaborative rewiring of the pluripotency network by chromatin and signalling modulating pathways. *Nat. Commun.* 6, 6188.
- Tu, W.B., Shiah, Y.J., Lourenco, C., Mullen, P.J., Dingar, D., Redel, C., Tamachi, A., Ba-Alawi, W., Aman, A., Al-Awar, R., et al. (2018). MYC interacts with the G9a histone methyltransferase to drive transcriptional repression and tumorigenesis. *Cancer Cell* 34, 579–595.e8.
- Utikal, J., Polo, J.M., Stadtfeld, M., Maherali, N., Kulalert, W., Walsh, R.M., Khalil, A., Rheinwald, J.G., and Hochedlinger, K. (2009). Immortalization eliminates a roadblock during cellular reprogramming into iPS cells. *Nature* 460, 1145–1148.
- Vedadi, M., Baryshte-Lovejoy, D., Liu, F., Rival-Gervier, S., Allali-Hasani, A., Labrie, V., Wigle, T.J., Dimaggio, P.A., Wasney, G.A., Siarheyeva, A., et al. (2011). A chemical probe selectively inhibits G9a and GLP methyltransferase activity in cells. *Nat. Chem. Biol.* 7, 566–574.



Vidal, S.E., Amlani, B., Chen, T., Tsigos, A., and Stadtfeld, M. (2014). Combinatorial modulation of signaling pathways reveals cell-type-specific requirements for highly efficient and synchronous iPSC reprogramming. *Stem Cell Rep.* 3, 574–584.

Wang, T., Chen, K., Zeng, X., Yang, J., Wu, Y., Shi, X., Qin, B., Zeng, L., Esteban, M.A., Pan, G., et al. (2011). The histone demethylases

*jhdm1a/1b* enhance somatic cell reprogramming in a vitamin-C-dependent manner. *Cell Stem Cell* 9, 575–587.

Wei, J., Antony, J., Meng, F., MacLean, P., Rhind, R., Laible, G., and Oback, B. (2017). KDM4B-mediated reduction of H3K9me3 and H3K36me3 levels improves somatic cell reprogramming into pluripotency. *Sci. Rep.* 7, 7514.

**Stem Cell Reports, Volume 15**

**Supplemental Information**

**Context-Dependent Requirement of Euchromatic Histone Methyltransferase Activity during Reprogramming to Pluripotency**

**Simon E. Vidal, Alexander Polyzos, Kaushiki Chatterjee, Ly-sha Ee, Emily Swanzey, Jorge Morales-Valencia, Hongsu Wang, Chaitanya N. Parikh, Bhishma Amlani, Shengjiang Tu, Yixiao Gong, Valentina Snetkova, Jane A. Skok, Aristotelis Tsirigos, Sangyong Kim, Effie Apostolou, and Matthias Stadtfeld**

## SUPPLEMENTAL FIGURES

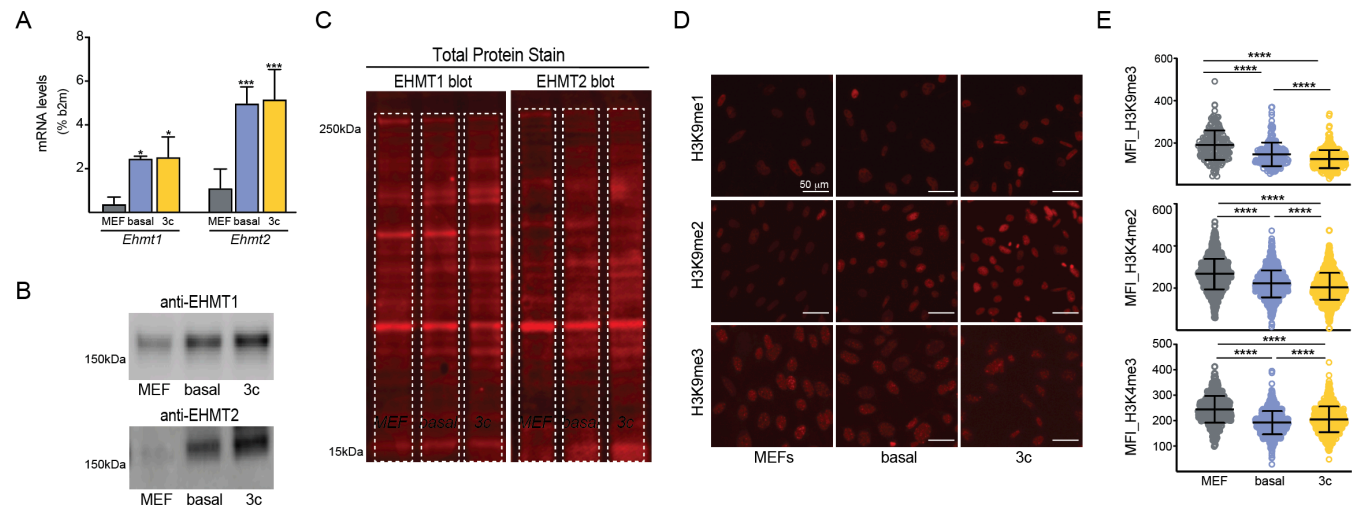

**Figure S1. Increased EHMT activity during early stages of OKSM-driven reprogramming. Related to Figure 1. (A)** Quantification of *Ehmt1* and *Ehmt2* by quantitative real-time PCR using RNA isolated from indicated conditions 24 h after initiation of reprogramming. N = 2 independent experiments. **(B)** Representative immunoblots of EHMT1 and EHMT2 protein 24 h after initiation of reprogramming. **(C)** Total protein staining of corresponding blot in (C). White dotted lines outline the areas used for total protein quantification, as used in Figures 1C, S4D and S5E. **(D)** Fluorescence images of MEFs and cells 24 h after initiation of reprogramming in indicated conditions after staining with antibodies against H3K9me1, H3K9me2 or H3K9me3, respectively. **(E)** Representative quantification of H3K9me3, H3K4me2 and H3K4me3 levels in indicated conditions. More than 100 nuclei of similar size were measured for each cell population in at least two independent experiments. Significance in (A,E) with one-way ANOVA with Tukey post-test with \* $p < 0.05$ , \*\*\* $p < 0.001$  and \*\*\*\* $p < 0.0001$ .

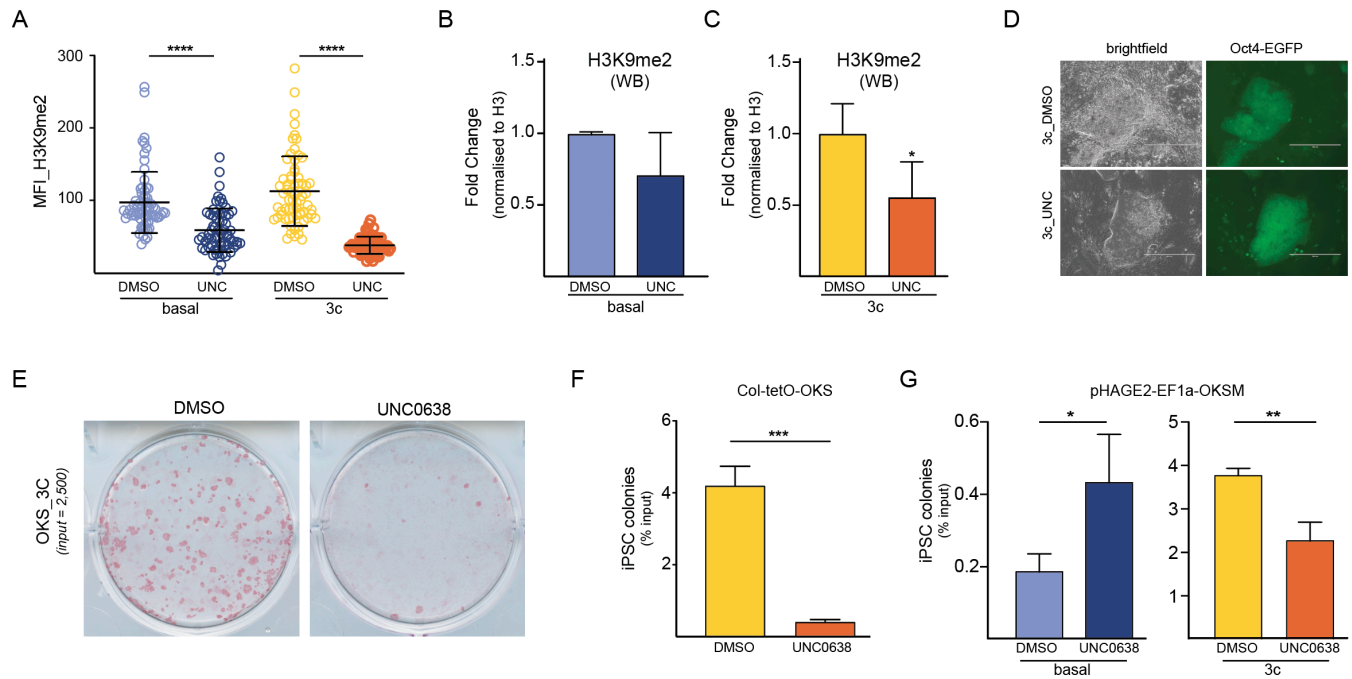

**Figure S2. EHMT activity supports 3c enhanced reprogramming. Related to Figure 2.** (A) Quantification by IF of H3K9me2 levels in cells either exposed to UNC0638 (UNC) or DMSO for the first 24 h of OKSM expression. Significance with one-way ANOVA with Sidak post-test, \*\*\*\* $p < 0.0001$ . At least 100 size-matched nuclei were quantified for each condition in three independent experiments. (B) Representative fold change (normalized to H3) of H3K9me2 protein levels analyzed after 24 h of reprogramming initiation by WB in basal conditions with UNC treatment ( $n = 4$  independent experiments). (C) Like (B) but in 3c enhanced conditions. (D) Representative images of colonies scored as iPSCs based on morphology and Oct4-EGFP expression. Scale bars indicate  $400\mu\text{m}$ . (E) Representative AP staining of transgene-independent iPSC colonies obtained upon expression of OKS in MEFs for nine days in 3c enhanced reprogramming conditions in absence and presence of UNC0638. (F) Quantification of iPSC colony formation upon OKS expression in indicated conditions.  $N = 3$  independent experiments (G) Number of iPSC colonies formed upon transducing MEFs with a constitutive lentiviral vector expressing OKSM and reprogramming cells under basal or 3c enhanced conditions in absence or presence of EHMT inhibitor.  $N = 3$  independent experiments. Significance in (F,G) with two-tailed t-test with \* $p < 0.05$ , \*\* $p < 0.01$  and \*\*\* $p < 0.001$ .



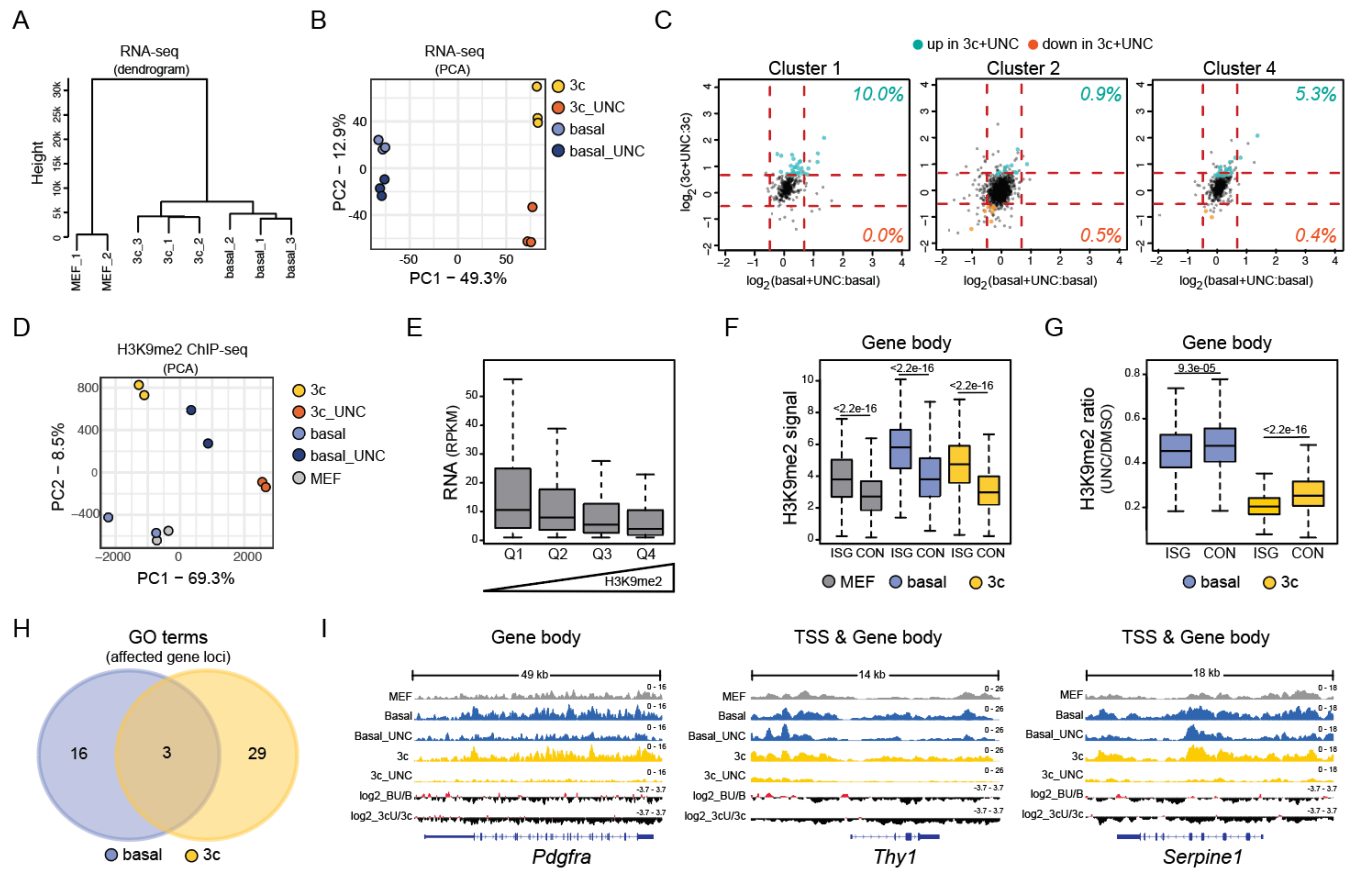

**Figure S3. Molecular consequences of EHMT inhibition during early reprogramming stages. Related to Figure 3.** (A) Hierarchical tree after unsupervised clustering of indicated RNA-seq samples. (B) Principal component analysis (PCA) of RNA-seq data obtained from cells undergoing reprogramming for two days in indicated conditions. (C) Effect of EHMT inhibition (UNC) on the expression levels of genes associated with clusters 1, 3 and 5 during basal (X-axis) and 3c enhanced (Y-axis) reprogramming. Transcripts with significantly changed abundance during enhanced reprogramming ( $p\text{-adj}<0.05$ ;  $\text{FC}>1.5$ ) are highlighted in green (failed downregulation) and orange (failed upregulation), respectively. Numbers indicate percentage of cluster-specific genes affected by UNC0638 (UNC). (D) PCA analysis of H3K9me2 ChIP-seq data in indicated conditions and cell types. (E) Average RNA expression levels (RPKM) of gene loci ranged based on H3K9me2 levels into four quartiles (Q1 lowest H3K9me2 and Q4 highest H3K9me2).  $N = 2$  independent experiments. (F) H3K9me2 ChIP-signal over the gene body in 328 MEF-associated genes inefficiently silenced (ISG) in presence of UNC0638 during 3c reprogramming and 2664 control MEF-associated genes that are efficiently silenced (CON).  $N = 2$  independent experiments. (G) Ratio of H3K9me2 signal in presence and absence of UNC0638 over the gene body of ISGs and control genes during basal and 3c reprogramming.  $N = 2$  independent experiments. (H) Pie diagram showing limited overlap of GO terms associated with gene loci whose H3K9me2 levels are most strongly affected during basal or during 3c enhanced reprogramming, respectively (see also Figure 3H). (I) Representative tracks showing H3K9me2 levels at three MEF-associated genes in MEFs and in indicated reprogramming conditions. Noteworthy features are increased H3K9me2 levels at gene bodies and/or TSS regions during reprogramming and dramatic reduction of this chromatin mark upon UNC0638 treatment in presence of 3c compounds.

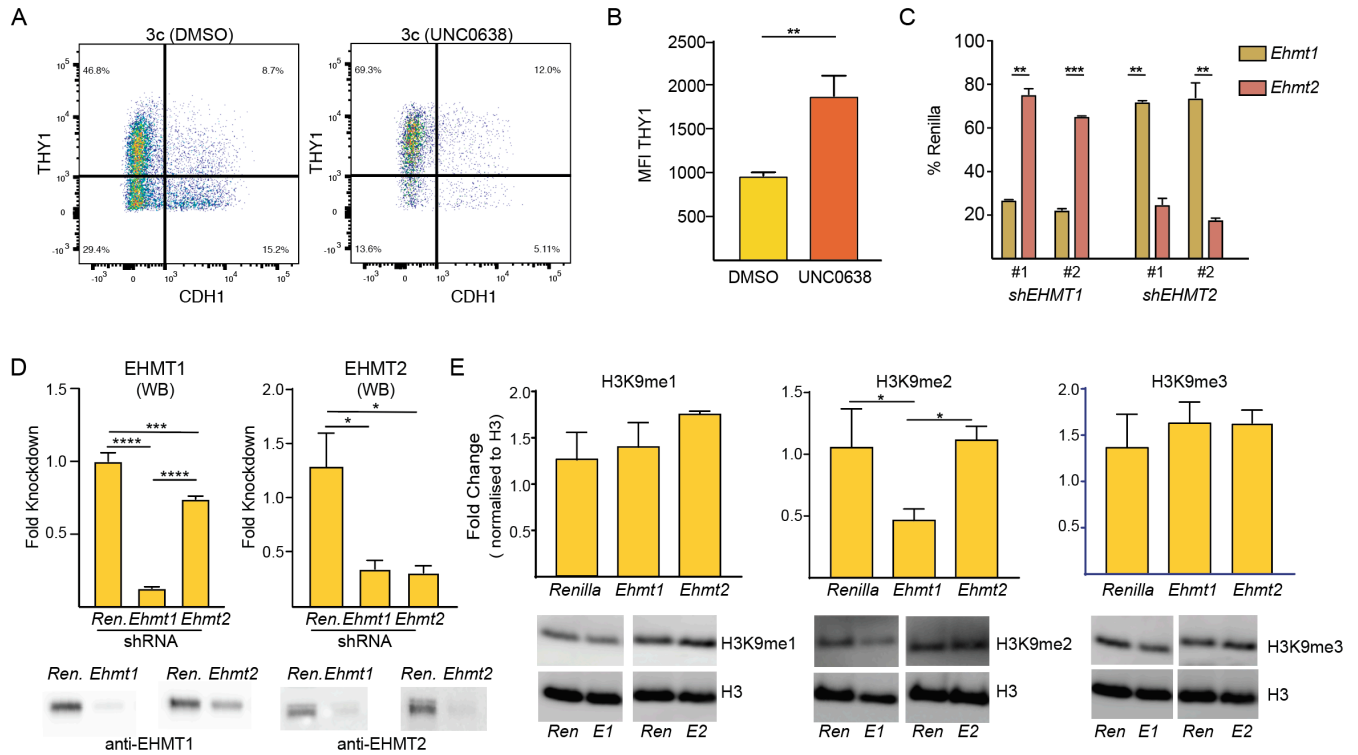

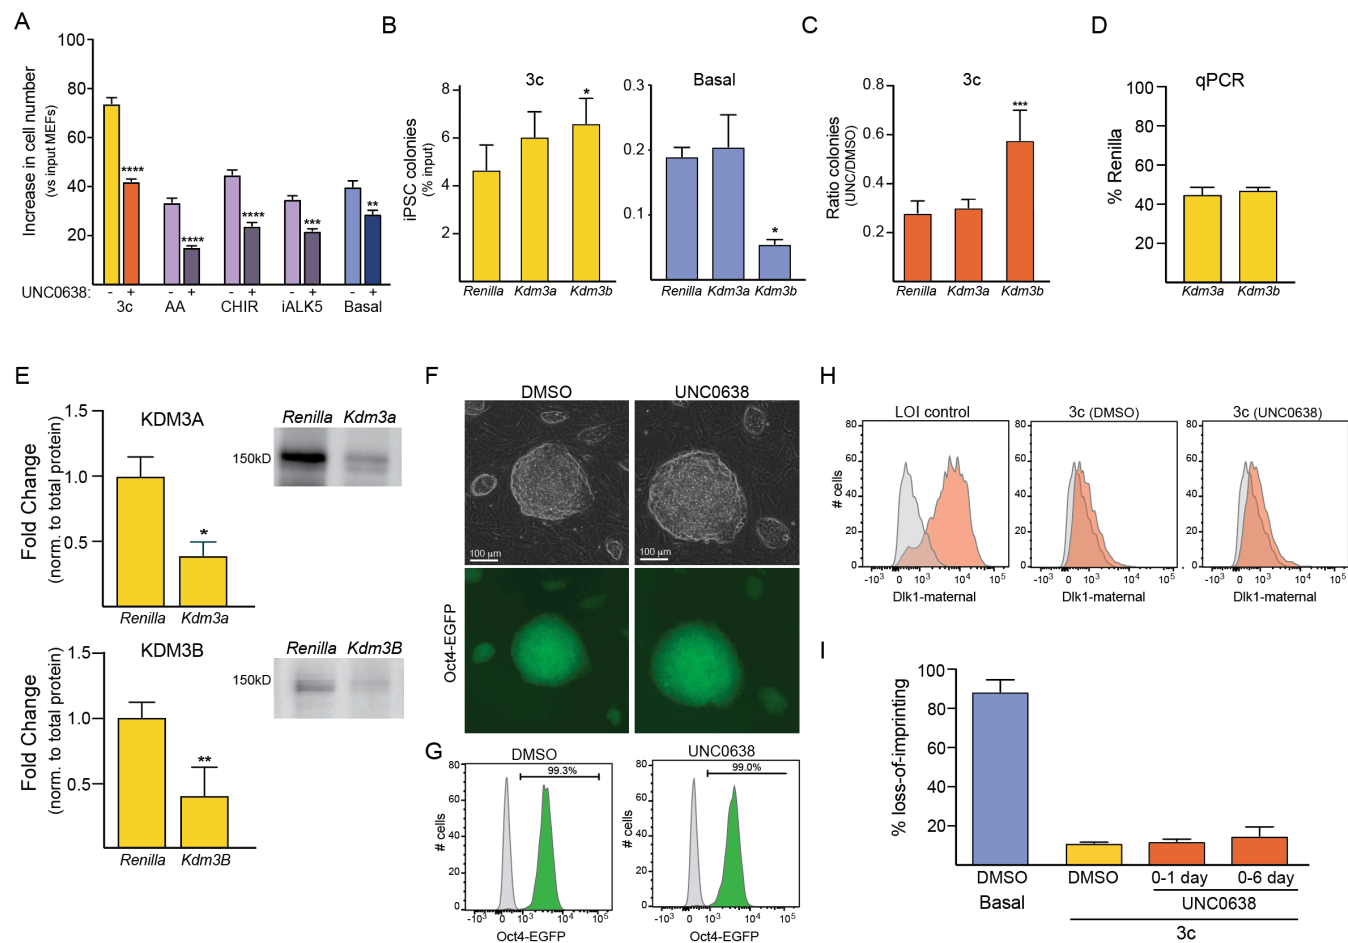

**Figure S5. AA establishes a requirement for EHMT activity during enhanced iPSC reprogramming. Related to Figure 5.** (A) Quantification of total cell numbers after expression of OKSM factors for 48 h in indicated conditions in absence or presence of UNC0638. N = 3 independent experiments. (B) Percentage of iPSC colonies (per input MEFs) formed after shRNA-mediated KD of *Kdm3a* or *Kdm3b* during 3c enhanced (left panel) and basal reprogramming (right panel), respectively. N = 2 (for basal) or 4 (for 3c) independent experiments. (C) Ratio of iPSC colonies formed during 3c enhanced reprogramming in presence and absence of EHMT inhibitor upon KD of indicated H3K9 demethylases. Significance in (B, C) with one-way ANOVA with Dunnett post-test with \* $p < 0.05$  and \*\*\* $p < 0.001$ . N = 4 independent experiments. (D) mRNA levels of *Kdm3a* and *Kdm3b* in cells undergoing reprogramming in 3c conditions for 24 h upon expression of respective shRNAs relative to cells expressing shRNA targeting *Renilla*. N = 2 independent experiments. (E) Representative immunoblots and quantification of KDM3A and KDM3B protein levels analyzed after 24 h of reprogramming initiation in shRNA transduced MEFs normalized to total protein levels in *Renilla* controls. N = 3 independent experiments. (F) Representative images of P1 3c-iPSCs derived in either absence or presence of UNC0638. (G) Quantification of Oct4-EGFP expression in 3c-iPSCs derived in either absence or presence of UNC0638. (H) Expression of the normally silenced maternal *Dlk1* allele as measured by flow cytometry in 3c-iPSCs derived either in absence or presence of EHMT inhibitor, compared to control cells in which imprint dysregulation (LOI) has resulted in upregulation of maternal *Dlk1*. Grey-shaded histogram indicates background fluorescence levels. (I) Quantification of the percentage cells expressing maternal *Dlk1* in iPSCs derived under indicated conditions. N = 3 independent experiments.

**Table S5. Oligos used**

| <b>Name</b>      | <b>Purpose</b> | <b>Sequence (5'-3')</b>                                                                           |
|------------------|----------------|---------------------------------------------------------------------------------------------------|
| miRE-Xho-fwd     | cloning        | TGAACTCGAGAAGGTATATTGCTGTTGACAGTGAGCG                                                             |
| miRE-EcoOligorev | cloning        | TCTCGAATTCTAGCCCCTTGAAGTCCGAGGCAGTAGGC                                                            |
| Ehmt1_1_97mer    | shRNA          | TGCTGTTGACAGTGAGCGCCGCTATGATGATGATGAATAATAGTGAAGCCACAGATGTATTATTCATCATCATCATAGCGTTGCCTACTGCCTCGGA |
| Ehmt1_2_97mer    | shRNA          | TGCTGTTGACAGTGAGCGAGACGGTGATTGAGATGTTTAATAGTGAAGCCACAGATGTATTAACATCTCAATCACCGTCCTGCCTACTGCCTCGGA  |
| Ehmt2_1_97mer    | shRNA          | TGCTGTTGACAGTGAGCGACCCCCTGATCTTTGAGTGTAATAGTGAAGCCACAGATGTATTACACTCAAAGATCAGGGGGTGCCTACTGCCTCGGA  |
| Ehmt2_2_97mer    | shRNA          | TGCTGTTGACAGTGAGCGATGCAGCTCAATCGAAAGCTTATAGTGAAGCCACAGATGTATAAGCTTTCGATTGAGCTGCAGTGCCTACTGCCTCGGA |
| Kdm3a_97mer      | shRNA          | TGCTGTTGACAGTGAGCGCCAGGAGATTACAATTCAACAATAGTGAAGCCACAGATGTATTGTTGAATTGTAATCTCCTGATGCCTACTGCCTCGGA |
| Kdm3b_97mer      | shRNA          | TGCTGTTGACAGTGAGCGCCACGATGAAGAAGTACTCAAATAGTGAAGCCACAGATGTATTTGAGTACTTCTTCATCGTGATGCCTACTGCCTCGGA |
| Kdm3a_fwd        | qPCR           | CAGCAACTCCATCTAGCAAGG                                                                             |
| Kdm3a_rev        | qPCR           | TGTTCTCGGTACTTCAGGTTTTG                                                                           |
| Kdm3b_fwd        | qPCR           | TGTGGTGTGTGAGCCGTC                                                                                |
| Kdm3b_rev        | qPCR           | TCTGGGATCTACTGACTTGACC                                                                            |
| b2m_fwd          | qPCR           | TTCTGGTGCTTGTCTCACTGA                                                                             |
| b2m_rev          | qPCR           | CAGTATGTTGCGCTTCCCATTG                                                                            |

## SUPPLEMENTAL EXPERIMENTAL PROCEDURES

### Mice

Derivation, handling, and genotyping of reprogrammable mice (JAX011001) with the *Oct4-GFP* allele were described previously (Stadtfield et al., 2010). All animal experiments were in accordance with the guidelines of the NYU School of Medicine Institutional Animal Care and Use Committee.

### Basic cell culture and cell culture-based assays

MEF cultures were established by trypsin digestion of midgestation (embryonic day (E) 13.5–E15.5) embryos and maintained in DMEM supplemented with 10% FBS, L-glutamine, penicillin/streptomycin, nonessential amino acids and  $\beta$ -mercaptoethanol. Reprogrammable MEFs were heterozygous for *Rosa26-rtTA* and for *Oct4-GFP* and either heterozygous for an inducible OKSM allele (Stadtfield et al., 2010) or homozygous for an inducible OKS allele (Borkent et al., 2016). Established iPSCs were cultured on growth-arrested feeder cells in KO-DMEM (Invitrogen) supplemented with L-glutamine, penicillin/streptomycin, nonessential amino acids,  $\beta$ -mercaptoethanol, 1,000 U/ml LIF and 15% FBS (“ESC medium”). Reprogramming was carried out as previously described (Vidal et al., 2014). Briefly, were seeded on a layer of growth-arrested feeder cells in ESC medium in the presence of 1  $\mu$ g/ml Dox and, if applicable, L-ascorbic acid (50  $\mu$ g/ml), CHIR99021 (3  $\mu$ M) and TGF- $\beta$  RI Kinase Inhibitor II (250 nM) (“3c”). The number of input MEFs ranged between 50-500 cells/cm<sup>2</sup> and was adjusted to prevent overcrowding in the more efficient conditions and allow the formation of sufficient numbers of colonies for reliable quantification in the less efficient conditions. If applicable, UNC0638 (1  $\mu$ M) was added. Media was changed every other day. Colonies were scored visually based on ESC-like morphology and expression of the Oct4-GFP reporter allele after several days in absence of dox, which represents a stringent assessment of pluripotency (Amlani et al., 2018). Colonies were visualized for low magnification image capture after alkaline phosphatase staining. To determine the effect of UNC0638 treatment on cellular proliferation 25,000 reprogrammable MEFs were seeded on each well of gelatinized 12-well plates in MEF media. After 12 hours, media was replaced with mESC media containing either DMSO or UNC0638, Dox and the applicable reprogramming-enhancing chemicals. After 72 hours, cells were harvested, adjusted to the same volume and counted using a Beckman Coulter Z1 Particle Counter.

### Immunofluorescence

Reprogrammable MEFs grown on gelatinized 24-well plates in absence of feeders were fixed with paraformaldehyde (4%), permeabilized with Triton X-100 (0.5%), and stained in blocking buffer (5% goat serum, 2 mg/ml fish skin gelatin and 0.2% Tween20 in PBS) with primary antibodies against H3K9me1 (ab9045; 1:200), H3K9me2 (ab1220; 1:200), H3K9me3 (ab8898; 1:200), H3K4me2 (ab7766; 1:200), H3K4me3 (ab8580; 1:200), EHMT1 (ab41969; 1:200) or EHMT2 (C6H3, 1:50) for one hour at room temperature, following by staining with appropriate AlexaFluor555-conjugated secondary antibodies (1:1000). After counterstaining nuclei with DAPI, cells were imaged on a Nikon Eclipse TiE scope equipped with a Lumencor Light Engine and a Neo 5.5 cSMOS camera (Andor). Images belonging to the same experimental series were imaged on the same day using identical instrument and software settings. Fluorescence intensities were determined in NIS elements after background subtraction and after using the autodetect function to identify nuclei based on DAPI signal. Measured fluorescence values were exported to

Prism (GraphPad) for selection of similar-sized nuclei ( $n > 100$  for each experiment) and statistical analysis.

### **Tetraploid blastocyst injections**

Zygotes were isolated from BDF1 females as previously described (Stadtfield et al., 2012) and cultured overnight until they reached the 2-cell stage. One hour after electro-fusion, 1-cell embryos were separated from embryos that had failed to fuse, cultured for another two days and then injected with iPSCs, using 5-10 cells per blastocyst. Viable pups were defined as those that survived for at least three days following birth. Statistical analysis was conducted in Prism (GraphPad).

### **shRNA mediated knockdown**

97-mer oligonucleotides against specific target genes were designed using the splashRNA algorithm (Pelossof et al., 2017), PCR amplified using the primers miRE-Xho-fwd and miRE-EcoOligorev and cloned into the miRE plasmid backbones (Fellman et al. 2013). Viruses were produced using the packaging vectors psPax2, MD2G and Pasha/DCr8 and used on reprogrammable MEFs seeded at about 30% confluency at titers that achieved 20-30% transduction efficiency (determined using an EGFP cassette present miRE) before selection. After virus washout, selection was carried out in MEF media with 500  $\mu\text{g/ml}$  G418 for a total of four days, with one passage after two days. After washout of G418 and one day of culture in MEF media for recovery, cells were harvested, counted and seeded onto growth-arrested feeder cells for reprogramming or onto gelatinized plates for RNA and/or protein extraction. Transduction efficiencies after selection ranged between 80-90% based on EGFP fluorescence. Knockdown was confirmed using quantitative PCR using gene-specific primers. All oligonucleotides are listed in **Table S8**.

### **Lentiviral reprogramming**

Reprogramming was carried out by incubation of MEFs carrying the Oct4-EGFP reporter (but no transgenic OKSM cassette) with doxycycline-inducible mouse OKSM (pHAGE2-tetO-STEMCCA)(Sommer et al., 2009) and rtTA (FUdeltaGW-rtTA, Addgene 19780) (Maherali et al., 2008) lentiviruses to achieve between 20-30% of cells expressing OKSM in a dox-dependent manner (corresponding to on average a single pHAGE2-tetO-STEMCCA insertion per transduced cell). Without selection, MEFs were then seeded at a density of approximately 2,500 cells/cm<sup>2</sup> (for basal reprogramming) and 250 cells/cm<sup>2</sup> (for 3c reprogramming) onto a layer of Mitomycin-C-treated feeder cells in ESC media supplemented with doxycycline and, if applicable, UNC0638 and 3c compounds. Media was changed every two days and on day 7 (for 3c reprogramming) or day 12 (for basal reprogramming) dox and all other compounds were washed out, followed by four more days of culture in ESC medium before colonies were scored based on Oct4 expression. Reprogramming efficiencies were calculated based on the total number of input MEFs.

### **Flow cytometry**

Reprogramming cultures were harvested by incubation with pre-warmed 0.25% trypsin/1mM EDTA solution for 5 minutes at 37°C. Single-cell suspensions were obtained by repetitive pipetting and transfer through a 40  $\mu\text{m}$  cell strainer. Cells were incubated with eFluor 450-conjugated anti-THY1 (53-2.1), biotin-conjugated anti-CDH1 (DECMA-1) and PE/Cy7-conjugated anti-EpCAM (G8.8), followed by incubation with Streptavidin-APC (all eBiosciences)

and data acquired on a FACS LSR2 (BD Biosciences), using DAPI to identify dead cells. Data analysis was conducted with FlowJo (Tree Star) and with Prism (GraphPad). For the relative quantification of different intermediate cell populations in absence and presence of UNC0638, cultures were harvested completely at the indicated day of reprogramming, stained with the appropriate antibodies, volume adjusted and run through the flow cytometer for the same amount of time at identical acquisition speeds. Total numbers of intermediates were determined after gating in FlowJo and corresponding ratios (UNC0628 sample/DMSO sample) calculated. For the assessment of *Dlk1-Dio3* imprint stability, 3c iPSCs were obtained in either absence or presence of UNC0638 from reprogrammable MEFs carrying a dual fluorescent reporter system for quantification of allele-specific expression of the *Dlk1* gene, which normally is only expressed from the paternal allele (Swanzy and Stadtfeld, 2016). Established iPSCs cells were differentiated at early passage to trigger *Dlk1* expression and the percentage of *Dlk1*-expressing cells with an (abnormal active) maternal allele quantified. Statistical analysis of flow cytometry data was conducted in Prism, using at least 500 cells of each population of interest for each biological repeat.

### **Western blot analysis**

Reprogrammable MEFs were grown on gelatinized plates in absence of feeders. Cells were collected 24 hours after initiation of reprogramming for each treatment group. Nuclear protein was extracted using the Thermo Scientific NE-PER kit (Catalog Number 78833). For analysis of histone methylation marks, protein extraction was carried out using the Abcam histone extraction kit (ab113476). Protein was quantified using the Bio Rad protein Assay Dye (#5000006). Equal amount of protein was loaded for each set of experiment (range 5 to 15  $\mu$ g) with NuPAGE™ LDS Sample Buffer (4X) in NuPAGE 4-12% Bis Tris protein gels. Gels were run using MES running buffer or MOPS running buffer in XCell SureLock Mini-Cell. Protein gels were blotted using the XCell II™ Blot Module and PVDF membrane, followed by straining of transfer membranes with Revert™ 700 Total Protein Stain. Fluorescent images for total protein quantification were taken immediately after staining using the Azure Biosystem C series. Membranes were transferred to a blocking buffer (5% nonfat milk in TBST) and incubated with gentle shaking for 2 h. Membranes were then probed with primary antibody and incubated overnight with gentle agitation at 4°C. After incubation blots were washed with TBST (Tris-Buffered Saline with Tween-20) and probed with respective secondary antibodies in blocking buffer. Finally, blots were washed with TBST and incubated in Clarity western ECL substrate chemiluminescent detection reagent (Bio-Rad #1705062). The following antibodies were used:

EHMT1(Ab41969) 1:1000, EHMT2(C6H3) 1:800, H3K9me2(Ab8896) 1:800, H3K9me2(Ab1220) 1:800, H3K9me3(Ab8898) 1:800, H3(Ab1791) 1:1000, KDM3A(12835-1-AP) 1:500, KDM3B(19915-1-AP) 1:500. For densitometric analysis, chemiluminescent blots were imaged with Azure Biosystem. AzureSpot software was used to measure individual band and total protein lane intensities. For each case background was subtracted for quantification. All blots were normalized over total protein or H3, as indicated in the figure legend. All data was analyzed using GraphPad Prism software. One-way ANOVA with Tukey's positive test or student's t test were used for statistical analyses.

### **RNA-seq library preparations and analysis**

Total RNA was extracted from either 2 million reprogrammable MEFs or established iPSCs grown on gelatinized plates in absence of feeders with the RNeasy Plus Kit (Qiagen) and samples with

RIN values > 8 were subjected to Automated TruSeq stranded total RNA with RiboZero Gold library preparation (Illumina). Single-end 50 bp reads were generated with HiSeq2500. RNA-seq raw sequencing data were aligned to mouse genome version mm10 with the tophat algorithm (version 2.1.0)(Kim et al., 2013) and the use of «--b2-very-sensitive» parameter. Samtools (version 1.8) (Li et al., 2009) was used for data filtering and file format conversion. Aligned reads were assigned to exons with the use of the HT-seq count (version 0.5.4p3) algorithm (Anders et al., 2015) and the following parameters «-m intersection -nonempty». Differentially expressed genes were identified with the use of DESeq R package (R.3.4.4) (Anders and Huber, 2010), excluding genes with RPKM<1. R was used for PCA analysis of all genes whose expression was above 1 RPKM in at least one condition and for k-mean clustering on Z-transformed normalized expression levels of DEGs between MEFs and early reprogramming intermediates with default settings and k=5. Gene ontology analysis was conducted using Gorilla (Eden et al., 2009) and REVIGO (Supek et al., 2011). Raw sequencing data are submitted in GEO under accession number GSE130490.

### **ChIP-seq**

MEFs were reprogrammed in basal or 3c conditions with and without 1µM UNC0638 for 48 hours on gelatinized plates in absence of feeders. Native ChIP-seq was performed as previously described (Chen et al., 2018). 10 million cells were trypsinized, washed in ice-cold PBS, and flash frozen. Cell pellets were resuspended in Dounce Buffer (10mM Tris-HCl pH 7.5, 4mM MgCl<sub>2</sub>, 1mM CaCl<sub>2</sub>, protease inhibitors) with a 1:1 ratio of *Drosophila* Kc cells (for spike-in controls) and homogenized using 20 repetitions of a 25G syringe. Cells were treated with 150U/ml micrococcal nuclease (Worthington Biochemical) for 20 minutes at 37°C and reactions were quenched with 0.5M EDTA and incubated on ice for 5 minutes. MNase-digested cells were incubated on ice for 1 hour with vortexing every 10 minutes with 1ml Hypotonic Lysis Buffer (0.2mM EDTA, 0.1mM benzamidine, 0.1mM PMSF, 1.5mM DTT, PIC) followed by a 3000g spin at 4°C for 5 minutes. Supernatants were precleared by rotation for 2 hours at 4°C with Protein G Dynabeads (Life Technologies) that had been washed 3x in IP Buffer (10mM Tris-HCl pH 8.0, 1% Triton X-100, 0.1% Deoxycholate, 0.1% SDS, 90mM NaCl, 2mM EDTA, PIC). Precleared chromatin was combined in 2 million cell equivalents with 5ul H3K9me2 antibody (Abcam, ab1220) and 20ul washed Protein G Dynabeads in IP Buffer and rotated at 4°C overnight. Beads were then washed twice with ChIP Wash Buffer (20mM Tris-HCl pH 8.0, 0.1% SDS, 1% Triton X-100, 2mM EDTA, 150mM NaCl, PIC), once with Final ChIP Wash Buffer (20mM Tris-HCl pH 8.0, 0.1% SDS, 1% Triton X-100, 2mM EDTA, 500mM NaCl, PIC), and eluted twice 100ul Elution Buffer (100mM NaHCO<sub>3</sub>, 1% SDS) and RNase A at 68°C. Input chromatin for each sample was diluted to 200ul in Elution Buffer and DNA from all samples and inputs was purified using the QIAquick PCR Purification Kit (Qiagen). Libraries were prepared using the KAPA HyperPrep Kit (Roche) and sequenced (paired-end 50) on an Illumina HiSeq 4000.

### **ChIP-seq analysis**

Raw sequenced reads were aligned to both mouse (assembly mm10) and drosophila genome (assembly dm6) with Bowtie 2 (Langmead et al., 2009)(version 2.2.6) and --very-sensitive option, while filtering of poor quality and multi-mapped aligned reads was performed with the use of samtools (version 1.8). Picard tools (version 2.12.2) and MarkDuplicates option was used to remove duplicates, while enrichment of ChIP signal of the uniquely mapped reads was performed with the use of bedtools(Quinlan and Hall, 2010) coverageBed command (version 2.26.0) with --mean option. All reads from chrM and reads marked by blacklist regions (Amemiya et al., 2019)



were removed. Enrichment of mouse H3K9me2 signal was normalized to the number of drosophila aligned and filtered reads (per million). Representation of the enrichment signal with bigwig files was performed with genomeCoverageBed and bedGraphToBigWig(Kent et al., 2010). Genome wide or region specific (gene body, promoter) comparison of the median H3K9me2 normalized ChIP signal was performed with Wilcoxon rank sum test. PCA analysis of the genome wide distribution of H3K9me2 was performed with R. Genome was split into 2.5 kb bins and bins with no reads in all the experiments were discarded from the PCA analysis

## SUPPLEMENTAL REFERENCES

Amemiya, H.M., Kundaje, A., and Boyle, A.P. (2019). The ENCODE Blacklist: Identification of Problematic Regions of the Genome. *Sci Rep* 9, 9354.

Amlani, B., Liu, Y., Chen, T., Ee, L.S., Lopez, P., Heguy, A., Apostolou, E., Kim, S.Y., and Stadtfeld, M. (2018). Nascent Induced Pluripotent Stem Cells Efficiently Generate Entirely iPSC-Derived Mice while Expressing Differentiation-Associated Genes. *Cell Rep* 22, 876-884.

Anders, S., and Huber, W. (2010). Differential expression analysis for sequence count data. *Genome Biol* 11, R106.

Anders, S., Pyl, P.T., and Huber, W. (2015). HTSeq--a Python framework to work with high-throughput sequencing data. *Bioinformatics* 31, 166-169.

Borkent, M., Bennett, B.D., Lackford, B., Bar-Nur, O., Brumbaugh, J., Wang, L., Du, Y., Fargo, D.C., Apostolou, E., Cheloufi, S., *et al.* (2016). A Serial shRNA Screen for Roadblocks to Reprogramming Identifies the Protein Modifier SUMO2. *Stem Cell Reports* 6, 704-716.

Chen, C.C.L., Goyal, P., Karimi, M.M., Abildgaard, M.H., Kimura, H., and Lorincz, M.C. (2018). H3S10ph broadly marks early-replicating domains in interphase ESCs and shows reciprocal antagonism with H3K9me2. *Genome Res* 28, 37-51.

Eden, E., Navon, R., Steinfeld, I., Lipson, D., and Yakhini, Z. (2009). GOrilla: a tool for discovery and visualization of enriched GO terms in ranked gene lists. *BMC Bioinformatics* 10, 48.

Kent, W.J., Zweig, A.S., Barber, G., Hinrichs, A.S., and Karolchik, D. (2010). BigWig and BigBed: enabling browsing of large distributed datasets. *Bioinformatics* 26, 2204-2207.

Kim, D., Pertea, G., Trapnell, C., Pimentel, H., Kelley, R., and Salzberg, S.L. (2013). TopHat2: accurate alignment of transcriptomes in the presence of insertions, deletions and gene fusions. *Genome Biol* 14, R36.

Langmead, B., Trapnell, C., Pop, M., and Salzberg, S.L. (2009). Ultrafast and memory-efficient alignment of short DNA sequences to the human genome. *Genome Biol* 10, R25.

Li, H., Handsaker, B., Wysoker, A., Fennell, T., Ruan, J., Homer, N., Marth, G., Abecasis, G., Durbin, R., and Genome Project Data Processing, S. (2009). The Sequence Alignment/Map format and SAMtools. *Bioinformatics* 25, 2078-2079.

Maherali, N., Ahfeldt, T., Rigamonti, A., Utikal, J., Cowan, C., and Hochedlinger, K. (2008). A high-efficiency system for the generation and study of human induced pluripotent stem cells. *Cell Stem Cell* 3, 340-345.

Pelossof, R., Fairchild, L., Huang, C.H., Widmer, C., Sreedharan, V.T., Sinha, N., Lai, D.Y., Guan, Y., Premririt, P.K., Tschaharganeh, D.F., *et al.* (2017). Prediction of potent shRNAs with a sequential classification algorithm. *Nat Biotechnol* 35, 350-353.

Quinlan, A.R., and Hall, I.M. (2010). BEDTools: a flexible suite of utilities for comparing genomic features. *Bioinformatics* 26, 841-842.

Sommer, C.A., Stadtfeld, M., Murphy, G.J., Hochedlinger, K., Kotton, D.N., and Mostoslavsky, G. (2009). Induced pluripotent stem cell generation using a single lentiviral stem cell cassette. *Stem Cells* 27, 543-549.

Stadtfeld, M., Apostolou, E., Ferrari, F., Choi, J., Walsh, R.M., Chen, T., Ooi, S.S., Kim, S.Y., Bestor, T.H., Shioda, T., *et al.* (2012). Ascorbic acid prevents loss of Dlk1-Dio3 imprinting and facilitates generation of all-iPS cell mice from terminally differentiated B cells. *Nat Genet* 44, 398-405, S391-392.

Stadtfeld, M., Maherali, N., Borkent, M., and Hochedlinger, K. (2010). A reprogrammable mouse strain from gene-targeted embryonic stem cells. *Nat Methods* 7, 53-55.

Supek, F., Bosnjak, M., Skunca, N., and Smuc, T. (2011). REVIGO summarizes and visualizes long lists of gene ontology terms. *PLoS One* 6, e21800.

Swanzy, E., and Stadtfeld, M. (2016). A reporter model to visualize imprinting stability at the Dlk1 locus during mouse development and in pluripotent cells. *Development* 143, 4161-4166.

Vidal, S.E., Amlani, B., Chen, T., Tsigos, A., and Stadtfeld, M. (2014). Combinatorial modulation of signaling pathways reveals cell-type-specific requirements for highly efficient and synchronous iPSC reprogramming. *Stem Cell Reports* 3, 574-584.
